# 1 Symbiosis between river and dry lands: phycobiont dynamics 2 on river gravel bars

3  
4 Lucie Vančurová<sup>1</sup>, Veronika Kalníková<sup>2</sup>, Ondřej Peksa<sup>3</sup>, Zuzana Škvorová<sup>1</sup>, Jiří Malíček<sup>4</sup>, Patricia Moya<sup>5</sup>,  
5 Kryštof Chytrý<sup>2</sup>, Ivana Černajová<sup>1</sup>, Pavel Škaloud<sup>1</sup>

6 <sup>1</sup>Charles University, Faculty of Science, Department of Botany, Benátská 2, 128 01 Prague 2, Czech  
7 Republic

8 <sup>2</sup>Department of Botany and Zoology, Faculty of Science, Masaryk University, Kotlářská 2, 611 37 Brno,  
9 Czech Republic

10 <sup>3</sup>The West Bohemian Museum in Pilsen, Kopeckého sady 2, 301 00 Plzeň, Czech Republic

11 <sup>4</sup>The Czech Academy of Sciences, Institute of Botany, Zámek 1, 252 43 Průhonice, Czech Republic

12 <sup>5</sup>Dpto. Botánica, ICBIIE Fac. CC. Biológicas, Universitat de València, Dr. Moliner, 50. 46100-Burjassot,  
13 Valencia, Spain

14  
15 Corresponding author: Lucie Vančurová, Charles University, Faculty of Science, Department of  
16 Botany, Benátská 2, 128 01 Prague 2, Czech Republic, fax: +420 221 95 16 45,  
17 [lucie.vancurova@natur.cuni.cz](mailto:lucie.vancurova@natur.cuni.cz)

18  
19 ORCID: Lucie Vančurová 0000-0002-1370-1020; Veronika Kalníková 0000-0003-2361-0816; Ondřej  
20 Peksa 0000-0002-3366-2970; Jiří Malíček 0000-0002-3119-8967; Patricia Moya 0000-0003-0397-  
21 863X; Kryštof Chytrý 0000-0003-4113-6564; Ivana Černajová 0000-0001-9526-4647; Pavel Škaloud  
22 0000-0003-1201-3290

## 23 24 Acknowledgements

25 We thank Helmut Mayrhofer and Jan Vondrák for their help with identification of a few critical  
26 lichen samples, Svatava Kubešová for help with bryophyte identification and Vít Grulich and Jiří  
27 Danihelka for identification of some specimens of vascular plants. This work was supported by the  
28 Charles University Science Foundation project GAUK 946417, the Primus Research Programme of  
29 Charles University no. SCI/13 and by the long-term research development project RVO 67985939.

## 30 Abstract

31 River gravel bars are dynamic and heterogeneous habitats standing on transition between  
32 aquatic and terrestrial environment. Periodical flooding, low nutrient content, frost, missing safe  
33 sites, drought, and heat on the ground surface significantly influence life in these habitats.  
34 Mutualistic symbiosis may be a successful strategy for organisms to survive and to proliferate under  
35 harsh conditions. The lichen genus *Stereocaulon* was selected as a model symbiotic system among  
36 the organisms living on river gravel bars. The aim of our work was to determine effect of this  
37 dynamic environment on a phycobiont (i.e., green eukaryotic photobiont) community structure. We  
38 analysed 147 *Stereocaulon* specimens collected in the Swiss Alps using Sanger sequencing (fungal ITS  
39 rDNA, algal ITS rDNA, algal actin type I gene) and 8 selected thalli and 12 soil samples using Illumina  
40 metabarcoding (ITS2 rDNA). We performed phytosociological sampling on each study plot (n=13).  
41 Our analyses of communities of phycobionts, lichens, bryophytes, and vascular plants indicated an  
42 ongoing colonisation by phycobionts and gradual change of phycobiont community along to the  
43 successional gradient. We recovered great phycobiont diversity associated with *Stereocaulon*  
44 mycobionts including algae reported as phycobionts for the first time. Each of two *Stereocaulon*  
45 mycobiont OTUs has distinct pool of predominant phycobionts in the study area. Finally, all thalli  
46 selected for Illumina metabarcoding contained a wide range of additional intrathalline algae, i.e.,  
47 showed algal plurality. In general, succession process on newly emerged or recently disturbed  
48 localities also takes place within a community of microscopic symbiotic organisms, such as  
49 phycobionts.

50 Key words: selectivity, lichen phycobionts, succession, community composition, metabarcoding, algal  
51 plurality

## 52 Introduction

53 River gravel bars are dynamic and heterogeneous habitats ranging from glacial floodplains and  
54 alpine wide river valleys to piedmont (Montgomery and Buffington 1998; Malard et al. 2006; Tockner  
55 et al. 2006; Hohensinner et al. 2018). Periodical floods together with variation of speed and intensity  
56 of the water current, model richly braided channels with a mosaic of channels, pools, bars and  
57 islands (Junk et al. 1989; Tockner et al. 2000; Ward et al. 2002). Destruction and reformation of the  
58 river gravel bars by floods results in a wide structural change and a cyclic vegetation succession.  
59 Gravel bar vegetation is characterized by early-successional pioneer vegetation and subsequent,  
60 mainly shrub, vegetation stages in the colonization sequence (Pettit and Froend 2001; Prach et al.  
61 2016). These vegetation types form a mosaic of units according to microhabitat environmental  
62 conditions and disturbance level (Müller 1996; Tockner et al. 2000; Wellstein et al. 2003; Gilvear et

63 al. 2008). Gravel bars in alpine zones contribute significantly to the regional diversity of an otherwise  
64 harsh alpine environment (Tockner and Malard 2003). Early- to mid-successional stands are often  
65 occupied by relatively species rich communities of vascular plants of high evenness and relatively low  
66 vegetation cover. In later successional stages, the evenness and species richness decrease as organic  
67 matter and nutrients accumulate and the competition from established dominant species increase.  
68 This pattern was shown gravel bars, for example, by Corenblit et al. (2009), Prach et al. (2014),  
69 Kalníková et al. (2018).

70 Alpine rivers with glacier source are highly influenced by daily flooding, due to melting of  
71 glaciers which makes the environment even more extreme (e.g. Milner and Petts 1994; Tockner et al.  
72 2000; Malard et al. 2006). Low nutrient content in a substrate surface represents the most limiting  
73 environmental factor in the glacier floodplains. Especially the recently unglaciated terrain is  
74 characterized by bare soils which do not contain any organic matter and the soil seed bank is initially  
75 not present. In addition, frost, missing safe sites, drought, and heat on the ground surface  
76 significantly influence life in these habitats (Stöcklin and Bäumler 1996; Tockner et al. 2006;  
77 Marcante et al. 2014). Common strategies of the gravel bar species are usually high diasporas  
78 dispersability, fast growth, disturbance tolerance, clonal growth and ability to grow on poor soils  
79 (Jeník 1955; Vitt et al. 1986; Muotka and Virtanen 1995; Stöcklin 1999; Karrenberg et al. 2003;  
80 Ellenberg and Leuschner 2010).

81 Under harsh conditions of river gravel bars, mutualistic symbiosis may be a successful strategy  
82 for the organisms to survive and to proliferate (Doty et al. 2016). Since lichens represent one of the  
83 oldest known and recognizable examples of mutualistic symbiosis living under stressful conditions  
84 (Seckbach and Grube 2010), we selected the *Stereocaulon* lichens, among the organisms living on  
85 river gravel bars, as a model symbiotic system. The *Stereocaulon* genus is widespread and  
86 ecologically successful and is a pioneer lichen growing in harsh conditions on newly formed  
87 substrates (Stretch and Viles 2002; Meunier et al. 2014). Moreover, previous studies confirmed its  
88 ability to survive episodic submersion (Sadowsky et al. 2012), even though it is not natively aquatic.  
89 Recently, an exceptional diversity of phycobionts was discovered to be associated with *Stereocaulon*,  
90 including three ecologically diversified trebouxiophycean genera *Asterochloris*, *Vulcanochloris* and  
91 *Chloroidium* (Vančurová et al. 2015, 2018).

92 The lichen host ecological amplitude may be greatly influenced by its specificity towards the  
93 photobionts (Rolshausen et al. 2017; Vančurová et al. 2018). Symbiotic interactions vary along the  
94 environmental gradients (Godschalx et al. 2019) and could be affected by stressful environments  
95 (Romeike et al. 2002; Engelen et al. 2010). Therefore, the aim of our work was to determine the

96 phycobiont diversity pattern of *Stereocaulon alpinum* in the gradient of the vegetation succession.  
97 We applied both Sanger sequencing (n=147) and Illumina metabarcoding (n=8) to *Stereocaulon*  
98 *alpinum* specimens collected in 13 study plots to address the following questions: 1) Is the  
99 phycobiont diversity influenced by succession, water regime, or alternatively other biotic and abiotic  
100 conditions?; 2) Do *Stereocaulon* lichens use their ability to co-operate with various phycobionts to  
101 cope with extreme conditions on river gravel bars of glacial floodplains?; 3) Do *Stereocaulon* lichens  
102 show algal plurality in this habitat?

## 103 Material and Methods

### 104 Study area and field sampling

105 The sampling was carried out in August 2017. The study area covered three glacial valleys (1)  
106 Morteratsch valley and 2) Roseg valley in the Bernina range and 3) Lötschental valley of the Lonza  
107 River in the Bernese Alps in the Swiss Alps. Four localities (Morteratsch, Roseg I, Roseg II and Lonza)  
108 situated on the river gravel bars of glacial floodplains (1995–2070 m a. s. l.) were sampled. We  
109 carried out 13 vegetation plots of 4 × 4 m. A detailed description of the location of each plot is  
110 provided in Online Resource 1/Table S1. Study plots in the localities belong to three succession  
111 stages: first (early-successional), second (defined by shrub layer), and third (the most developed  
112 usually with tree layer). In the locality Roseg II, only first and second stages were present. Examples  
113 of study plots belonging to different succession stages are given in Online Resource 2/Fig. S1.

114 Coordinates of each plot were recorded using a portable GPS device (WGS-84 coordination  
115 system). We recorded all lichen, bryophyte and vascular plant species within the vegetation plots.  
116 Lichens and bryophytes were collected from the ground and stones. In each plot we estimated  
117 visually: a) the cover of each species according to the extended Braun-Blanquet cover scale  
118 (Westhoff and Van Der Maarel 1978), b) the total vegetation cover and the cover of each layer (tree,  
119 shrub, herb, moss and lichen). We measured the elevation of the gravel bar (as a distance from its  
120 highest point to the actual water level with a tape) as well as distance from the river. One soil sample  
121 per plot was taken. Data on vegetation structure for each plot are listed in the Online Resource  
122 1/Table S2. The substrate of all localities is rather acidic (in several cases with basic fractions), since  
123 the *Stereocaulon* lichens do not occur on calcareous substrata (Lamb 1951).

124 On each plot, at minimum 10 *Stereocaulon* samples were collected. For each *Stereocaulon*  
125 sample the type of substrate and affiliation to the plot was noted. Lichen morphospecies were  
126 identified in the field as well as in the laboratory using standard microscopic and chemical methods,  
127 including spot tests and thin-layer chromatography (TLC). *Stereocaulon* vouchers were deposited in  
128 Herbarium collection of the Charles University in Prague (PRC). Vouchers of accompanying lichens

129 were deposited in the personal herbarium of J. Malíček. Vascular plants and bryophytes which were  
130 not identified in the field (unambiguous cases) were collected and identified in the lab. All records on  
131 vegetation plots were stored in the Gravel bar vegetation database – ID: EU-00-025 (Kalníková and  
132 Kudrnovsky 2017), which is included in the European Vegetation Archive (Chytrý et al. 2016).  
133 Nomenclature follows Euro+Med PlantBase (2006–2019) for vascular plants, Hill et al. (2006) for  
134 mosses, Grolle & Long (2000) for liverworts, and Nimis et al. (2018) for lichens.

### 135 DNA extraction, amplification, and Sanger sequencing

136 DNA was extracted from lichen thalli (total lichen DNA). Lichen thalli were examined under a  
137 dissecting microscope and washed with water before DNA extraction to remove possible surface  
138 contamination. Total genomic DNA was isolated from thallus fragments following the CTAB protocol  
139 (Cubero et al. 1999). Both algal and fungal nuclear internal transcribed spacers (ITS rDNA) and the  
140 algal actin type I gene (including one complete exon and two introns located at codon positions 206  
141 and 248; Weber and Kabsch 1994) were PCR amplified using primers listed in Online Resource  
142 1/Table S3. PCRs were performed as described in Vančurová et al. (2018). All PCR were performed in  
143 20 µl using Red Taq Polymerase (Sigma) as described by Peksa and Škaloud (2011) or with My Taq  
144 Polymerase. Negative controls, without DNA template, were included in every PCR run to eliminate  
145 false-positive results caused by contaminants in the reagents. The PCR products were sequenced  
146 using the same primers at Macrogen in Amsterdam, Netherlands. The newly obtained sequences  
147 were deposited in GenBank under accession numbers xxx (Online Resource 1/Table S4).

### 148 Sequence alignment and DNA analyses

149 *Asterochloris* datasets were analyzed both as a single locus for the ITS rDNA (data not shown)  
150 and as a concatenated dataset of ITS rDNA and actin type I loci. The *Asterochloris* ITS rDNA dataset  
151 consisted of 202 sequences: 142 newly obtained sequences and 60 previously published sequences  
152 from *Stereocaulon* and other lichens retrieved from GenBank. The actin type I dataset consisted of 68  
153 sequences: 7 newly obtained sequences, and 60 previously published sequences. The alignment was  
154 automatically performed by MAFFT v.7 software (Katoh and Standley 2013) under the Q-INS-I  
155 strategy and manually edited according to the published secondary structures of ITS2 rDNA (Škaloud  
156 and Peksa 2010) using MEGA v.6 (Tamura et al. 2013). The actin type I sequences were aligned using  
157 MAFFT v.7 software (Katoh and Standley 2013) under the Q-INS-I strategy. After deleting identical  
158 sequences, the resulting concatenated alignment comprised 64 samples represented by unique ITS  
159 rDNA and actin type I sequences.

160 The *Stereocaulon* (mycobiont) ITS rDNA dataset comprised 171 sequences: 145 newly obtained  
161 sequences and 26 representative sequences selected to cover all main clades 1–8 published by  
162 Högnabba (2006). The alignment was automatically performed by MAFFT v.7 software (Katoh and

163 Standley 2013) under the Q-INS-I strategy. After removing identical sequences, the resulting  
164 alignment comprised 48 sequences. All DNA alignments are freely available on Mendeley Data:  
165 <http://dx.doi.org/10.17632/jchg5h3t5k.1>.

166 Phylogenetic relationships were inferred with Bayesian Inference (BI) carried out in MrBayes  
167 v.3.2.2 (Huelsenbeck and Ronquist 2001), maximum likelihood (ML) analysis implemented in GARLI  
168 v.2.0 (Zwickl 2006), and maximum parsimony (MP) analysis using PAUP v.4.0b10 (Swofford 2003). BI  
169 and ML analyses were carried out on a partitioned dataset to differentiate among ITS1, 5.8 S and ITS2  
170 rDNA, actin intron 206, actin intron 248, and actin exon regions. The best-fit substitution models  
171 (Online Resource 1/Table S5) were selected using the Bayesian information criterion (BIC)  
172 implemented in JModelTest2 (Guindon and Gascuel 2003; Darriba et al. 2012). ML analysis was  
173 carried out using default settings, five search replicates, and the automatic termination set at 5  
174 million generations. The MP analysis was performed using heuristic searches with 1000 random  
175 sequence addition replicates and random addition of sequences (the number was limited to  $10^4$  per  
176 replicate). ML and MP bootstrap support values were obtained from 100 and 1000 bootstrap  
177 replicates, respectively. Only one search replicate was applied for ML bootstrapping.

## 178 Statistical analyses

179 From the total of 147 samples with successfully sequenced phycobiont, two were excluded  
180 because of the absence of the mycobiont sequence. The phylogeny of *Stereocaulon alpinum* showed  
181 two lineages (OTU35 and OTU2; see below). Since the mycobiont identity affects the phycobiont  
182 diversity (Vančurová et al. 2018) four samples belonging to the minority species-level lineage (OTU2)  
183 were also excluded. Thus, statistical analyses were carried out using 141 members of the prevailing  
184 mycobiont species-level lineage (OTU35) and their photobionts.

185 The relationship between species richness of *Stereocaulon alpinum* (OTU35) phycobionts and  
186 overall lichen species richness was inspected as a correlation between the number of phycobiont  
187 species-level lineages and number of lichen species. Since the number of samples per plot varied, the  
188 number of phycobiont species-level lineages were down-sampled to the smallest sample size in the  
189 data set which was 5 samples (Online Resource 2/Fig. S2). After excluding the study plot number 11  
190 (with sample size of 5 samples), the smallest sample size in the data set increased to 10 samples. The  
191 rarefaction was performed using the *rarefy* function in *vegan* R package (Oksanen et al. 2019). The  
192 linear regression was performed separately for dataset including all plots and for dataset restricted  
193 to plots with sample size  $\geq 10$ . Since the parametric regression analyses can be significantly biased in  
194 small sample sizes, we performed the Bayesian linear regression instead. We constructed a  
195 regression model where we modelled the number of phycobionts ( $X_i$ ) as  $X_i \sim Normal(\mu_i, \sigma)$ , where  $\mu_i$   
196 was determined as  $a + b * \text{number of lichen species}_i$  ( $a$  = intercept,  $b$  = slope of the regression line)

197 and  $\sigma$  as the variance of the residuals. The priors were set as follows:  $a \sim \text{Normal}(0, 0.001)$ ,  $b \sim$   
198  $\text{Normal}(0, 0.001)$ ,  $\sigma \sim \text{Uniform}(0, 100)$ .

199 The gradual change of phycobiont community composition was inspected as a correlation  
200 between the proportion of the two most abundant phycobiont species-level lineages ((number of  
201 *Asterochloris phycobiontica* samples + number of StA5 lineage samples)/number of all samples) and  
202 the succession stage (coded 1, 2, 3). We constructed a regression model where we modelled the  
203 proportion of the most abundant phycobionts ( $X_i$ ) as  $X_i \sim \text{Normal}(\mu_i, \sigma)$ , where  $\mu_i$  was determined as  
204  $a + b * \text{succession stage}_i$  ( $a$  = intercept,  $b$  = slope of the regression line) and  $\sigma$  as the variance of the  
205 residuals. The priors were set as described above. We ran three chains of the model for 1,000,000  
206 iterations, discarding the initial 100,000 as burnin. We fit the regression model in program JAGS v.  
207 4.2.0 (Plummer 2003) through the *R2JAGS* package (Su and Yajima 2009) in R.

208 To inspect the dynamics of phycobiont communities in the context of the river gravel bar  
209 habitats, two PCoA ordinations were created. We used two different proxies to explain the  
210 vegetation succession on river gravel bars: the cover of shrub layer and the cover of crustose lichens.  
211 For this purpose, successional status of study plots was classified into two groups (early successional  
212 and developed). This classification provides two alternative views on successional processes. Both  
213 ordination analyses were based on the square-rooted Bray-Curtis dissimilarity. The original Braun-  
214 Blanquet cover-abundance values were transformed to percentage and square-root transformed in  
215 order to calculate the dissimilarity index. The first ordination was computed based on vascular plant  
216 communities and the second on bryophytes + lichens. In both ordination plots, Ellenberg-type  
217 indicator values (Ellenberg et al. 1991) for light and temperature were passively superimposed. In the  
218 plot based on bryophytes + lichens, indicator values for bryophytes were used (Hill et al. 2006). We  
219 also compared if the variation of different taxa groups corresponds to similar environmental  
220 conditions, by calculating procrustes distances between taxa groups. The output was then used as  
221 input distance matrix for PCoA ordination, visualizing a relative dissimilarities of community  
222 composition gradients of the taxa groups.

223 The vegetation plot data were stored in Turboveg for Windows v.2 database (Hennekens and  
224 Schaminée 2001) and further managed with JUICE software (Tichý 2002) and in the R environment (R  
225 Core Team 2017) with the help of the *vegan* R package (Oksanen et al. 2019).

226 Bipartite association network between study plots and phycobiont species-level lineages was  
227 produced using *bipartite* R package (Dormann et al. 2008).

## 228 Illumina metabarcoding of algal communities in selected lichen thalli and soil samples

229 In order to describe algal plurality in *Stereocaulon* thalli, Illumina metabarcoding was  
230 performed. Eight selected thalli (four assigned to mycobiont OTU35 and four to OTU2) were  
231 rehydrated with Milli-Q sterile water one day before being processed and stored in a growth  
232 chamber at 20°C under a 12h/12h light/dark cycle (15  $\mu\text{mol}/\text{m}^2/\text{s}$ ). Thalli were cleaned under a  
233 stereomicroscope to remove soil particles and then superficially sterilized following Arnold et al.  
234 (2009). Fragments from different parts of each thallus were randomly excised and pooled together  
235 (0.1 mg). Total genomic DNA was isolated and purified using the DNeasy Plant Mini Kit (Qiagen,  
236 Hilden, Germany).

237 Soil from study plots (one sample per plot) was sampled. Soil samples were sieved to remove  
238 all possible contaminations. Total genomic DNA was isolated and purified using the Soil DNA Isolation  
239 Plus Kit® (Norgen Biotek Corp.), following the manufacturer's instructions.

240 Chlorophyta algal communities associated with the eight thalli and twelve soil samples were  
241 assayed using Illumina high-throughput sequencing of ITS2 of the rRNA operon, proposed as a  
242 universal barcode across eukaryotic kingdoms (Coleman 2009). High-coverage PCR primers at  
243 conserved sites were designed using a custom database for the algal phylum Chlorophyta (Online  
244 Resource 1/Table S3).

245 Amplicons for Illumina MiSeq sequencing were generated from nested PCR: in the first PCR the  
246 forward 1378-Chlorophyta (newly designed; Online Resource 1/Table S3) and the reverse ITS4  
247 primers (White et al. 1990) were used (27 amplification cycles were run), in the second PCR three  
248 replicates were amplified using the primers 5.8F-Chlorophyta (newly designed; Online Resource  
249 1/Table S3) and ITS4 modified with Illumina overhang adaptors (forward overhang: 5'-TCG TCG GCA  
250 GCG TCA GAT GTG TAT AAG AGA CAG-3'; reverse overhang: 5'-GTC TCG TGG GCT CGG AGA TGT GTA  
251 TAA GAG ACA G-3'; 22 cycles). These three replicates were then pooled together. PCR reactions were  
252 performed as described in Moya et al. (2017).

253 PCR products were purified using AMPure XP beads (Beckman Coulter). Indexing PCR and  
254 addition of Nextera sequence adapters were performed using Nextera XT Index kit (Illumina Inc., San  
255 Diego, CA, United States) following the protocol for Illumina L library preparation. Finally, a second  
256 purification round was carried out using AMPure XP beads. Libraries were then quantified and  
257 pooled together. The libraries were sequenced on Illumina MiSeq platform using the MiSeq Reagent  
258 Kit v3 (paired end 2x 300 bp), at STAB Vida, Lisbon, Portugal and Genomics Core Facility at the  
259 University of Valencia, Spain.



## 260 Bioinformatic analyses

261 Quality control analysis of the Illumina MiSeq paired-end reads was performed using the  
262 FastQC v.0.11.8. Raw reads were processed using Quantitative Insights Into Microbial Ecology 2  
263 (QIIME2 v.2018.11; Bolyen et al. 2018). Demultiplexed paired-end sequence reads were  
264 preprocessed using DADA2 (Callahan et al. 2016), a package integrated into Qiime2 that accounts for  
265 quality filtering, denoising, joining paired ends, and removal of chimeric sequences. The first 20 bp  
266 were trimmed from forward and reverse reads before merging to remove adaptors. In order to  
267 remove lower quality bases, amplicon sequence variants (ASVs) were truncated at position 210  
268 based on the FastQC reports during this step.

269 Subsequent analyses were based on the ASV table, which contained the count for each unique  
270 sequence in each sample. Only ASVs with frequency  $\geq 100$  were further analyzed. BLAST searches  
271 were used to confirm the sequence identity. Solely algal sequences were further analyzed.  
272 Phylogenetic tree (Online Resource 2/Fig. S3) was inferred with Bayesian Inference (BI) using  
273 MrBayes v.3.2.2 (Huelsenbeck and Ronquist 2001) as described above. Euler diagrams were  
274 produced using *eulerr* R package (Larsson 2019).

## 275 Results

### 276 Vegetation on study plots

277 In total, we noted 88 taxa of vascular plants, 19 taxa of bryophytes and 45 taxa of lichens  
278 within 13 study plots. Online Resource 1/Table S1 contains summary of species richness for particular  
279 plots.

### 280 Phycobiont and mycobiont phylogenetic analysis

281 The predominant phycobiont detected in *Stereocaulon* thalli by Sanger sequencing of ITS  
282 rDNA, belong in a 97% of samples to the genus *Asterochloris* and only five specimens represent other  
283 trebouxiophycean algae. In the case of these five specimens, coded as A574, A574.1, A633, A634 and  
284 A634V the identity of the phycobiont was confirmed by Blast search against the GenBank database.  
285 Significant matches of 99% to 87% were obtained with *Coccomyxa viridis* HG973000 for A574,  
286 *Elliptochloris reniformis* LT560354 for A574.1 and uncultured Trebouxiophyceae FJ554399 for A633,  
287 A634 and A634V. These three sequences formed a well-supported clade with more distantly related  
288 sequence KF907701 (86% sequence similarity; Online Resource 2/Fig. S3) previously assigned to clade  
289 URa28 (Ruprecht et al. 2014). We follow this nomenclature hereafter for these sequences.

290 The phylogenetic hypothesis resulting from Bayesian analysis of the ITS rDNA and actin type I  
291 sequences of *Asterochloris* (Fig. 1) is congruent with previous studies (Peksa and Škaloud 2011;  
292 Gauslaa et al. 2013; Škaloud et al. 2015; Moya et al. 2015; Vančurová et al. 2018). The species

293 boundaries delimited in Vančurová et al. 2018 and nomenclature used *ibidem* were maintained. We  
294 recovered a total of 14 lineages, including one novel lineage here referred to as StA9. Eleven of these  
295 lineages were previously found as phycobionts of *Stereocaulon* (Vančurová et al. 2018 and references  
296 therein), namely, *Asterochloris glomerata*, *A. irregularis*, *A. italiana*, *A. lobophora*, *A. phycobiontica*,  
297 *A. aff. italiana*, *Asterochloris* clade 8, *Asterochloris* clade 12, *Asterochloris* StA3, *Asterochloris* StA4  
298 and *Asterochloris* StA5. Two (*Asterochloris echinata* and *A. leprarii*) were found in association with  
299 *Stereocaulon* mycobiont for the first time here. The most frequently occurring phycobionts linked  
300 with the lineages *Asterochloris* StA5 and *A. phycobiontica*.

301 A phylogram resulting from Bayesian analysis of ITS rDNA sequences of *Stereocaulon*  
302 mycobiont is shown in Fig. 2. The majority of the recovered mycobiont sequences formed a well-  
303 supported lineage delimited as OTU35 by Vančurová et al. (2018). Five sequences matched with a  
304 distant related OTU2 (sister to DQ396973 and DQ396974), despite the morphological similarity of all  
305 studied samples. Both OTU35 and OTU2 fall into Group 8b *sensu* Högnabba (2006).

### 306 Phycobiont community structure and its changes

307 *Stereocaulon alpinum* OTU2 was sampled only in two study plots (numbers 8 and 11) and its  
308 phycobionts were successfully sequenced in four cases. One sequence was assigned to *Asterochloris*  
309 *italiana* and three sequences to trebouxiophycean lineage termed URa28. None of them was shared  
310 with the predominant *Stereocaulon* mycobiont (OTU35) in the study area.

311 *Stereocaulon alpinum* OTU35 (n=141) associated with 15 species-level lineages of phycobionts  
312 in the study area: 13 lineages of *Asterochloris*, one *Coccomyxa* and one *Elliptochloris*. Phycobionts  
313 from two to six species level lineages were recorded in each of 13 study plots (Fig. 3). When the  
314 sample size was reduced to five samples, 2-3.7 phycobiont species per plot were estimated. For the  
315 sample size of 10 (plot 11 with only five samples was excluded), 2.8-5.3 phycobiont species per plot  
316 were estimated.

317 Species richness of *Stereocaulon alpinum* OTU35 phycobionts increased significantly with the  
318 species richness of all lichens recorded at a study plot (Fig. 4). Moreover, gradual change of  
319 phycobiont community composition was proved using Bayesian linear regression (Fig. 5). The  
320 proportion of two most abundant phycobiont species-level lineages (*Asterochloris phycobiontica* and  
321 *Asterochloris* StA5) decreased significantly with the succession stage in favor of other species  
322 recovered in lower frequency.

323 The gradient of succession in both ordinations (vascular-plants-based and non-vascular-plant-  
324 based; Fig. 6) positively correlated with the diversity of lichens and phycobionts and the number of  
325 locally rare phycobionts (defined as all species with the exception of the species *Asterochloris* StA5

326 and *A. phycobiontica* highly prevalent in the study area; Fig. 3). Phycobiont communities of early-  
327 successional stages were relatively species poor and mostly consisted of species generally abundant  
328 in the study area (thus, the species composition was similar within study sites). With ongoing  
329 succession, the number of locally rare phycobiont species increased altogether with the total number  
330 of phycobiont species and the number of lichen species. The diversity of vascular plants and  
331 bryophytes was not associated with this gradient. Higher moss layer cover and higher amount of light  
332 demanding species of both bryophytes and vascular plants were typical of the early-successional  
333 stages.

334 As indicated by the PCoA based on procrustes distances of taxa groups (Fig. 7), the variation of  
335 species composition of photobiont communities responded to the environment similarly as that of  
336 bryophyte communities, while clearly differing from vascular plants and lichens (Online Resource  
337 1/Table S2). Note that the gradient of species diversity of taxa groups did not correspond to that of  
338 their community composition.

### 339 Microalgal metabarcoding

340 Phycobiont diversity within particular lichen thalli (n=8) was inspected using Illumina  
341 metabarcoding. A total of 1,945,186 raw reads were generated, of which 1,240,063 passed the  
342 demultiplexing step and quality filter. This represented a mean of 155,007 (median 179,415) algal  
343 reads per sample, with a minimum of 38,329 and a maximum of 246,121 reads per sample. Filtered  
344 metabarcoding dataset consisted of 116 hits (4 to 44 per sample).

345 Abundances of recovered algal clades by sample are shown in Fig. 8. The predominant  
346 phycobiont covered from 52.4 to 98.8% reads. Thalli A523M, A554M, A563M, and A570M (assigned  
347 to the mycobiont OTU35) contained various *Asterochloris* species as the predominant phycobiont:  
348 lineage StA9 (sample A523M), *A. irregularis* (A563M) and *A. phycobiontica*/StA4/StA5 (A554M and  
349 A570M). The species-level lineages StA4, StA5 and *A. phycobiontica* are undistinguishable using ITS2  
350 rDNA marker. Relative frequency of ASVs linked to *Asterochloris* spp. by sample is shown in Online  
351 Resource 2/Fig. S4. Thalli A597M, A598M, A633M, and A634M (assigned to mycobiont OTU2)  
352 contained predominant phycobiont from the trebouxiophycean lineage URa28.

### 353 Diversity of soil algae

354 Phycobiont diversity in twelve soil samples was analyzed using Illumina metabarcoding. A total  
355 of 1,524,198 raw reads were generated, 876,596 of which passed the demultiplexing step and quality  
356 filter. This represented a mean of 73,049 (median 63,827) algal reads per sample, with a minimum of  
357 18,255 and a maximum of 164,643 reads per sample. Filtered metabarcoding dataset consisted of  
358 427 hits (4 to 89 per sample). The phylogenetic hypothesis resulting from Bayesian analysis of the  
359 ITS2 rDNA sequences obtained by Illumina metabarcoding of soil samples, selected lichen samples

360 and reference sequences from GenBank is shown in Online Resource 2/Fig. S3. We recovered  
361 sequences in 44 well-supported clades, 27 of which contain exclusively soil algae, two contain  
362 exclusively phycobionts and 15 are shared by these two groups. Occurrence of particular clades of  
363 soil algae on each study plot is depicted in Online Resource 2/Fig. S5.

364 We also analyzed the occurrence of particular algal ITS2 haplotypes, including whole dataset  
365 obtained by Sanger sequencing (probably predominant phycobionts; Fig. 9a). Nine haplotypes were  
366 obtained by Sanger sequencing, in common with Illumina sequencing of soil and lichens. Vast  
367 majority of haplotypes was unique for soil (n=256) or Illumina lichen (n=79) datasets. On the  
368 contrary, 27 haplotypes were shared by soil and lichens but were not detected by Sanger sequencing  
369 of *Stereocaulon* in the study area. Same analysis restricted to haplotypes with frequency  $\geq 1000$  (in  
370 order to eliminate possible bias produced by errors from PCR and sequencing; Huse et al. 2010)  
371 showed a similar pattern (Fig. 9b).

## 372 Discussion

### 373 Change of community structure along a succession gradient

374 The succession on river gravel bars is an important driver of both species' composition and  
375 diversity. It is well documented in case of vascular plants (e. g., Gilvear et al. 2008; Prach et al. 2014),  
376 but also applies to the microorganisms, such as soil bacteria or mycorrhizal fungi (Li et al. 2014;  
377 Sheng et al. 2017). However, different taxa groups response differently to this gradient. For example,  
378 vascular plants are known to follow a nested-community pattern when the highest species diversity  
379 is connected to the early- to mid-successional stages and the community is being impoverished with  
380 the ongoing succession (e. g., Walker and del Moral 2003; Corenblit et al. 2009; Chytrý et al. 2015).  
381 This corresponds to the pattern of vascular-plant-species-richness observed within this study.

382 On the other hand, the pattern observed for the phycobiont communities of *Stereocaulon*  
383 lichens differed. The phycobiont communities of early-vegetation stages were composed of relatively  
384 few species lineages such as *Asterochloris phycobiontica* or *Asterochloris* StA5 (Fig. 3), which are  
385 alpine and psychrophilic (Peksa and Škaloud 2011; Vančurová et al. 2018). As locally adapted, they  
386 are probably frequent also in source populations in the surroundings of the study plots. Therefore,  
387 newly emerged river gravel bars are easily colonized by *A. phycobiontica* and/or *Asterochloris* StA5  
388 lineage. In subsequent stages, the observed species richness of phycobiont algae was mostly higher  
389 and these two species-level lineages were gradually substituted by others (Fig. 5). We hypothesize  
390 that some of them could be specialized to slightly different microhabitat conditions within particular  
391 plots. For example, clades 8, 12 and StA3 tolerate higher pH (Piercey-Normore and DePriest 2001;  
392 Bačkor et al. 2010; Vančurová et al. 2018; Steinová et al. 2019). On the river gravel bars of glacial

393 floodplains, organisms with various substrate optima could coexist together because of  
394 heterogeneity of substrate transported by a river or glacier from more distant localities and various  
395 substrate layers. In the study area, acidophilic vascular plants and bryophytes dominated. However,  
396 occurrence of basophilic species such as *Didymodon fallax*, *Lophozia excisa*, *Syntrichia ruralis*, and  
397 *Veronica fruticans* is considered as indication of basic fractions in substrate.

398 The species richness of terricolous lichens on glacier forelands in Alps were positively  
399 correlated with time since deglaciation (Nascimbene et al. 2017) analogically to lichen species  
400 richness on deglaciated plots in maritime Antarctica (Favero-Longo et al. 2012). In both cases, most  
401 of species, once established, persisted to the oldest successional stages. On the river gravel bars the  
402 species richness of phycobionts was positively correlated with that of lichens (Fig. 4) but less with  
403 that of vascular plants and bryophytes (Fig. 6). This correlation probably indicates colonization of the  
404 localities by phycobionts and mycobionts using the similar dispersal strategies. On the other hand,  
405 we observed that the community composition variation (summarized by the procrustes tests; Fig. 7)  
406 of lichens and phycobiont communities of *Stereocaulon* lichens differed.

407 We hypothesized ongoing colonization of river gravel bars by the phycobionts, or alternatively,  
408 the acquisition of the phycobionts from soil *in situ* (Dal Grande et al. 2012; Fontaine and Beck 2012;  
409 Ohmura et al. 2019). We found several algal clades both in soil and lichens (Online Resource 2/Fig.  
410 S3), but the phycobiont pool seems to be independent of soil algae (Fig. 10). For example, the most  
411 frequent ITS2 rDNA haplotype among Sanger sequences (*A. phycobiontica*/StA4/StA5 recovered in  
412 69% of all samples) was present only in two soil samples in a very low amount (212 and 135 reads,  
413 which is 2.4% and 3.1% of algal reads, respectively). This result supports our hypothesis that  
414 phycobionts originating from the surroundings colonize the recently emerged plots without  
415 substantial contribution of “soil seed bank”. Still, these results should be perceived as the basis for  
416 future research. The number of soil samples is rather limited, and some taxa could be undetected  
417 (Rippin et al. 2018). However, the taxonomic composition of algae occurring on river gravel bars is  
418 comparable to the pool of soil algae detected in the forefield of Damma glacier in the Swiss Alps  
419 (Frey et al. 2013). Notably, a significantly different algal community was found in an early-  
420 successional stage, which is in their case represented by a bare soil near to a receding glacier. The  
421 lichen phycobionts, including *Asterochloris*, were reported from soil in transitional and developed  
422 stage. Besides others, they found the lineage StA9, firstly reported as lichen phycobiont in the  
423 present study.

424 Beck et al. (2019) found two haplotypes *Stichococcus antarcticus*, phycobiont of *Placopsis*  
425 lichen in maritime Antarctica, exclusively in areas deglaciated for a long time with more developed

426 soil and lichen community, unlike to other haplotypes occurring in whole area. The succession of  
427 vegetation causes numerous physical and chemical changes in soil. Therefore, the correlation  
428 between species richness of various organisms and successional stage (or age of the sample site) is  
429 frequently connected with changing soil characteristics, such as nutrient concentrations (Li et al.  
430 2014; Sheng et al. 2017). However, according the Ellenberg indication values (Online Resource  
431 1/Table S1), we did not detect such gradients along successional gradient in the study area.  
432 Contrarily, the gradients of distance from a river and the elevation above the water surface, are  
433 detectable in our data. Since the succession is blocked by river on gravel bars; succession gradient  
434 and distance from the river are naturally correlated. Nevertheless, no algae known from aquatic or  
435 humid environment (e.g. *Chloroidium*; Vančurová et al. 2018) were found as predominant  
436 phycobiont in samples growing in proximity to a river. Probably, the river disturbs the community  
437 occasionally but does not favor individuals tolerating submersion.

#### 438 Low specificity as an adaptive strategy

439 The specificity (i. e., the taxonomic range of acceptable partners; Rambold et al. 1998; Yahr  
440 et al. 2004, 2006) of both mycobiont and phycobiont has been considered as crucial characteristic of  
441 lichen interactions. The lower specificity towards symbiotic partners has been frequently reported as  
442 advantageous strategy in harsh environments (Romeike et al. 2002; Engelen et al. 2010), because it  
443 enables association with phycobionts adapted to a variety of conditions.

444 Two species-level lineages of *Stereocaulon* were recorded in the study area (Fig. 2). Both  
445 lineages are morphologically identical, also indistinguishable in the field. Overwhelming majority of  
446 samples belonged to OTU35, which has been reported to be low-specific towards its phycobionts  
447 (Vančurová et al. 2018). Frequently, the mycobionts belonging to this lineage adopted algae known  
448 generally as phycobionts of *Lepraria* lichens (*A. phycobiontica*, *A. echinata*, *A. leprarii*; Škaloud et al.  
449 2015), in the study area. We hypothesize that such a low specificity (OTU35 associated with 13  
450 species-level lineages of *Asterochloris* and in two cases also with representatives of other  
451 Trebouxiophacean phycobionts in study area) could facilitate colonizing heterogeneous and harsh  
452 habitat of river gravel bars of glacial floodplains.

453 On the other hand, none of the samples of *S. alpinum* OTU2 associated with the same  
454 phycobionts as the mycobiont OTU35, despite growing in the same environment. The OTU2  
455 mycobiont mostly associated with trebouxiophycean alga URa28 as a phycobiont. This alga was  
456 previously detected in a soil sample from Canada either as a soil alga or possibly as a phycobiont of  
457 *Stereocaulon* sp. which was recorded in the same place (Hartmann et al. 2009).

## 458 Algal plurality

459 The occurrence of more phycobiont species in a single lichen thallus (i.e., algal plurality) is a  
460 common but overlooked phenomenon (e. g. Bačkor et al. 2010; Moya et al. 2017; Onuț-Brännström  
461 et al. 2018) known also in *Stereocaulon* (Vančurová et al. 2018). However, various lichen species  
462 differ in the prevalence of algal plurality. Dal Grande et al. (2017) proved an occurrence of more  
463 phycobionts in 49.2% of *Lasallia hispanica* thalli but only in 1.7% of *L. pustulata* thalli. The algal  
464 plurality is mostly undetectable by the Sanger sequencing. Using the Illumina metabarcoding, we  
465 found more than one phycobiont in all selected samples from both mycobiont species-level lineages  
466 (Fig. 8). However, these samples were selected on the ground of difficulties with Sanger sequencing  
467 which could indicate the algal plurality (Paul et al. 2018). Illumina metabarcoding as well as the  
468 Sanger sequencing uncovered URa28 as a predominant phycobiont of *Stereocaulon alpinum* OTU2. In  
469 most cases, the phycobiont determined by the Sanger sequencing corresponds with a predominant  
470 phycobiont according to the high-throughput sequencing (Molins et al. 2018; Paul et al. 2018).

471 Even though the two mycobiont species-level lineages OTU2 and OTU35 differ in  
472 predominant phycobiont pool, they share the pool of other intrathalline algae, unlike two *Circinaria*  
473 spp. collected at the same location shared the predominant phycobiont, but showed a completely  
474 different pool of other intrathalline algae (Molins et al. 2018). The *Stereocaulon* OTUs differ  
475 significantly in the frequency of intrathalline algae (Fig. 8). Above all, most of the OTU35 (with  
476 *Asterochloris* as the predominant phycobiont) thalli contain also a small amount of URa28 algae and  
477 *vice versa*. Several algal clades interacted exclusively with one mycobiont species-level lineage, but  
478 their frequency was generally low. A comparable phycobiont pair *Trebouxia jamesii*/*Trebouxia* sp.  
479 TR9 found in *Ramalina farinacea* lichen is assumed to bring physiological benefits to that symbiotic  
480 system (Casano et al. 2011; Centeno et al. 2016). Alternatively, the minority phycobionts could occur  
481 in thalli without direct effects to the lichen. They might be used as a source of algal symbionts for  
482 other lichens in the locality.

## 483 Conclusions

484 The diversity of phycobionts shifts along the succession gradient on the river gravel bars. We  
485 revealed positive correlation between the species richness of phycobionts and the species richness of  
486 the accompanying lichens in the locality indicating ongoing colonization of this habitat by both  
487 groups. The phycobiont communities of early-successional stages comprised relatively few species  
488 lineages. In subsequent stages, the observed species richness of phycobionts was mostly higher and  
489 the species-level lineages typical for early-successional stages were gradually substituted by others  
490 probably adapted to heterogenous microhabitat conditions of the river gravel bars.

491 A substantial phycobiont diversity (including 14 *Asterochloris* species-level lineages and three  
492 additional trebouxiophycean algae) recovered on the river gravel bars suggested low specificity of  
493 *Stereocaulon* mycobionts. This range of phycobionts could help to cope with heterogenous and  
494 dynamic conditions on river gravel bars of glacial floodplains.

495 We found more than one phycobiont in all selected samples belonging to both mycobiont  
496 OTUs (OTU2 and OTU35). *Asterochloris* phycobionts were recovered as the predominant phycobionts  
497 of OTU35 and trebouxiophycean lineage URa28 was the predominant phycobiont of OTU2. Although,  
498 broad community of other intrathalline algae was shared by both mycobionts.

499 This study provides novel insights into community structure of symbiotic microorganisms  
500 under harsh and dynamic conditions of river gravel bars. Additionally, it poses several challenging  
501 questions concerning cryptic lichen species and specificity towards the photobionts, dispersal of  
502 microscopic symbionts, an ecological function of additional intrathalline algae and an observed  
503 discrepancy between communities of soil and lichen algae.

## 504 References

- 505 Arnold AE, Miadlikowska J, Higgins KL, et al (2009) A phylogenetic estimation of trophic transition  
506 networks for ascomycetous Fungi: Are lichens cradles of symbiotrophic Fungal diversification?  
507 *Syst Biol* 58:283–297. doi: 10.1093/sysbio/syp001
- 508 Bačkor M, Peksa O, Škaloud P, Bačkorová M (2010) Photobiont diversity in lichens from metal-rich  
509 substrata based on ITS rDNA sequences. *Ecotoxicol Environ Saf* 73:603–12. doi:  
510 10.1016/j.ecoenv.2009.11.002
- 511 Beck A, Bechteler J, Casanova-Katny A, Dzhilyanova I (2019) The pioneer lichen *Placopsis* in maritime  
512 Antarctica: Genetic diversity of their mycobionts and green algal symbionts, and their  
513 correlation with deglaciation time. *Symbiosis* 79:1–24. doi: 10.1007/s13199-019-00624-4
- 514 Bolyen E, Rideout JR, Dillon MR, et al (2018) QIIME 2: Reproducible, interactive, scalable, and  
515 extensible microbiome data science. *PeerJ Prepr*. doi: 10.7287/peerj.preprints.27295
- 516 Callahan BJ, McMurdie PJ, Rosen MJ, et al (2016) DADA2: High-resolution sample inference from  
517 Illumina amplicon data. *Nat Methods* 13:581
- 518 Casano LM, del Campo EM, García-Breijo FJ, et al (2011) Two *Trebouxia* algae with different  
519 physiological performances are ever-present in lichen thalli of *Ramalina farinacea*. *Coexistence*  
520 *versus competition?* *Environ Microbiol* 13:806–818. doi: 10.1111/j.1462-2920.2010.02386.x
- 521 Centeno DC, Hell AF, Braga MR, et al (2016) Contrasting strategies used by lichen microalgae to cope  
522 with desiccation-rehydration stress revealed by metabolite profiling and cell wall analysis.  
523 *Environ Microbiol* 18:1546–1560. doi: 10.1111/1462-2920.13249
- 524 Chytrý M, Dražil T, Hájek M, et al (2015) The most species-rich plant communities in the Czech  
525 Republic and Slovakia (with new world records). *Preslia* 87:217–278
- 526 Chytrý M, Hennekens SM, Jiménez-Alfaro B, et al (2016) European Vegetation Archive (EVA): an  
527 integrated database of European vegetation plots. *Appl Veg Sci* 19:173–180. doi:  
528 10.1111/avsc.12191



- 529 Coleman AW (2009) Is there a molecular key to the level of “biological species” in eukaryotes? A DNA  
530 guide. *Mol Phylogenet Evol* 50:197–203. doi: 10.1016/j.ympev.2008.10.008
- 531 Corenblit D, Steiger J, Gurnell AM, et al (2009) Control of sediment dynamics by vegetation as a key  
532 function driving biogeomorphic succession within fluvial corridors. *Earth Surf Process*  
533 *Landforms* 34:1790–1810. doi: 10.1002/esp.1876
- 534 Cubero OF, Crespo A, Fatehi J, Bridge PD (1999) DNA extraction and PCR amplification method  
535 suitable for fresh, herbarium-stored, lichenized, and other fungi. *Plant Syst Evol* 216:243–249.  
536 doi: 10.1007/BF01084401
- 537 Dal Grande F, Rolshausen G, Divakar PK, et al (2017) Environment and host identity structure  
538 communities of green algal symbionts in lichens. *New Phytol* 217:277–289. doi:  
539 10.1111/nph.14770
- 540 Dal Grande F, Widmer I, Wagner HH, Scheidegger C (2012) Vertical and horizontal photobiont  
541 transmission within populations of a lichen symbiosis. *Mol Ecol* 21:3159–72. doi:  
542 10.1111/j.1365-294X.2012.05482.x
- 543 Darriba D, Taboada GL, Doallo R, Posada D (2012) jModelTest 2: more models, new heuristics and  
544 parallel computing. *Nat Methods* 9:772. doi: 10.1038/nmeth.2109
- 545 Dormann CF, Gruber B, Freund J (2008) Introducing the bipartite Package: Analysing Ecological  
546 Networks. *R news* 8:8–11
- 547 Doty SL, Sher AW, Fleck ND, et al (2016) Variable nitrogen fixation in wild *Populus*. *PLoS One*  
548 11:e0155979. doi: 10.1371/journal.pone.0155979
- 549 Ellenberg H, Leuschner C (2010) *Vegetation Mitteleuropas mit den Alpen*. Eugen Ulmer, Stuttgart
- 550 Ellenberg H, Weber HE, Düll R, et al (1991) Zeigerwerte von Pflanzen in Mitteleuropa. *Scr Geobot*  
551 18:1–248
- 552 Engelen A, Convey P, Ott S (2010) Life history strategy of *Lepraria borealis* at an Antarctic inland site,  
553 Coal Nunatak. *Lichenol* 42:339–346. doi: 10.1017/S0024282909990600
- 554 Euro+Med (2006–2019) Euro+Med PlantBase – the information resource for Euro-Mediterranean  
555 plant diversity. <http://ww2.bgbm.org/EuroPlusMed/>
- 556 Favero-Longo SE, Worland MR, Convey P, et al (2012) Primary succession of lichen and bryophyte  
557 communities following glacial recession on Signy Island, South Orkney Islands, Maritime  
558 Antarctic. *Antarct Sci* 24:323–336. doi: 10.1017/S0954102012000120
- 559 Fontaine K, Beck A (2012) Photobiont relationships and phylogenetic history of *Dermatocarpon*  
560 *luridum* var. *luridum* and related *Dermatocarpon* species. *Plants* 1:39–60. doi:  
561 10.3390/plants1020039
- 562 Frey B, Bühler L, Schmutz S, et al (2013) Molecular characterization of phototrophic microorganisms  
563 in the forefield of a receding glacier in the Swiss Alps. *Environ Res Lett* 8:15033. doi:  
564 10.1088/1748-9326/8/1/015033
- 565 Gardes M, Bruns TD (1993) ITS primers with enhanced specificity for basidiomycetes-application to  
566 the identification of mycorrhizae and rusts. *Mol Ecol* 2:113–118
- 567 Gauslaa Y, Bidussi M, Solhaug KA, et al (2013) Seasonal and spatial variation in carbon based  
568 secondary compounds in green algal and cyanobacterial members of the epiphytic lichen genus  
569 *Lobaria*. *Phytochemistry* 94:91–8. doi: 10.1016/j.phytochem.2013.04.003
- 570 Gilvear D, Francis R, Willby N, Gurnell AMA (2008) Gravel bars: a key habitat of gravel-bed rivers for

- 571 vegetation. In: Habersack H, Piégay H, Rinaldi M (eds) Gravel-bed rivers VI: from process  
572 understanding to river restauration, Developmen. Elsevier, Amsterdam, pp 677–700
- 573 Godschalx AL, Rodríguez-Castañeda G, Rasmann S (2019) Contribution of different predator guilds to  
574 tritrophic interactions along ecological clines. *Curr Opin Insect Sci* 32:104–109. doi:  
575 10.1016/j.cois.2019.01.002
- 576 Grolle R, Long DG (2000) An annotated check-list of the Hepaticae and Anthocerotae of Europe and  
577 Macaronesia. *J Bryol* 22:103–140. doi: 10.1179/jbr.2000.22.2.103
- 578 Guindon S, Gascuel O (2003) A Simple, Fast, and Accurate Algorithm to Estimate Large Phylogenies by  
579 Maximum Likelihood. *Syst Biol* 52:696–704. doi: 10.1080/10635150390235520
- 580 Hartmann M, Lee S, Hallam SJ, Mohn WW (2009) Bacterial, archaeal and eukaryal community  
581 structures throughout soil horizons of harvested and naturally disturbed forest stands. *Environ*  
582 *Microbiol* 11:3045–3062. doi: 10.1111/j.1462-2920.2009.02008.x
- 583 Hennekens SM, Schaminée JHJ (2001) TURBOVEG, a comprehensive data base management system  
584 for vegetation data. *J Veg Sci* 12:589–591. doi: 10.2307/3237010
- 585 Hill MO, Bell N, Bruggeman-Nannenga MA, et al (2006) An annotated checklist of the mosses of  
586 Europe and Macaronesia. *J Bryol* 28:198–267. doi: 10.1179/174328206X119998
- 587 Högnabba F (2006) Molecular phylogeny of the genus *Stereocaulon* (Stereocaulaceae, lichenized  
588 ascomycetes). *Mycol Res* 110:1080–1092. doi: 10.1016/j.mycres.2006.04.013
- 589 Hohensinner S, Hauer C, Muhar S (2018) River Morphology, Channelization, and Habitat Restoration
- 590 Huelsenbeck JP, Ronquist F (2001) MRBAYES: Bayesian inference of phylogenetic trees.  
591 *Bioinformatics* 17:754–755. doi: 10.1093/bioinformatics/17.8.754
- 592 Huse SM, Welch DM, Morrison HG, Sogin ML (2010) Ironing out the wrinkles in the rare biosphere  
593 through improved OTU clustering. *Environ Microbiol* 12:1889–1898. doi: 10.1111/j.1462-  
594 2920.2010.02193.x
- 595 Jeník J (1955) Sukcese rostlin na náplavech řeky Belé v Tatrách (Succession of plants on gravel bars of  
596 the Belá River in the Tatra Mountains). *Acta Univ Carolinae* 4:1–59
- 597 Junk WJ, Bayley PB, Sparks RE (1989) The Flood Pulse Concept in River-Floodplain Systems. *Can J Fish*  
598 *Aquat Sci* 106:110–127
- 599 Kalníková V, Chytrý K, Chytrý M (2018) Early vegetation succession on gravel bars of Czech  
600 Carpathian streams. *Folia Geobot* 53:317–332. doi: 10.1007/s12224-018-9323-6
- 601 Kalníková V, Kudrnovsky H (2017) Gravel Bar Vegetation Database. *Phytocoenologia* 47:109–110. doi:  
602 10.1127/phyto/2017/0177
- 603 Karrenberg S, Kollmann J, Edwards PJ, et al (2003) Patterns in woody vegetation along the active  
604 zone of a near-natural Alpine river. *Basic Appl Ecol* 4:157–166. doi: 10.1078/1439-1791-00123
- 605 Katoh K, Standley DM (2013) MAFFT multiple sequence alignment software version 7: improvements  
606 in performance and usability. *Mol Biol Evol* 30:772–80. doi: 10.1093/molbev/mst010
- 607 Lamb IM (1951) On the morphology, phylogeny, and taxonomy of the lichen genus *Stereocaulon*. *Can*  
608 *J Bot* 29:522–584. doi: 10.1139/b51-045
- 609 Larsson J (2019) eulerr: Area-Proportional Euler and Venn Diagrams with Ellipses
- 610 Li Y, Wen H, Chen L, Yin T (2014) Succession of bacterial community structure and diversity in soil

- 611 along a chronosequence of reclamation and re-vegetation on coal mine spoils in China. PLoS  
612 One 9. doi: 10.1371/journal.pone.0115024
- 613 Malard F, Uehlinger U, Zah R, Tockner K (2006) Flood-Pulse and Riverscape Dynamics in a Braided  
614 Glacial River. Ecology 87:704–716. doi: 10.1890/04-0889
- 615 Marcante S, Erschbamer B, Buchner O, Neuner G (2014) Heat tolerance of early developmental  
616 stages of glacier foreland species in the growth chamber and in the field. Plant Ecol 215:747–  
617 758. doi: 10.1007/s11258-014-0361-8
- 618 Meunier JD, Kirman S, Strasberg D, et al (2014) Incipient weathering by *Stereocaulon vulcani* at  
619 Réunion volcanic island. Chem Geol 382:123–131. doi: 10.1016/j.chemgeo.2014.05.033
- 620 Milner AM, Petts GE (1994) Glacial rivers: physical habitat and ecology. Freshw Biol 32:295–307. doi:  
621 10.1111/j.1365-2427.1994.tb01127.x
- 622 Molins A, Moya P, García-Breijo FJ, et al (2018) Molecular and morphological diversity of *Trebouxia*  
623 microalgae in sphaerothalloid *Circinaria* spp. lichens. J Phycol 54:494–504. doi:  
624 10.1111/jpy.12751
- 625 Montgomery DR, Buffington JM (1998) Channel Processes, Classification, and Response. In: Naiman R,  
626 Bilby R (eds) River Ecology and Management. Springer-Verlag New York, pp 13–42
- 627 Moya P, Molins A, Martínez-Alberola F, et al (2017) Unexpected associated microalgal diversity in the  
628 lichen *Ramalina farinacea* is uncovered by pyrosequencing analyses. PLoS One 12:1–21. doi:  
629 10.1371/journal.pone.0175091
- 630 Moya P, Škaloud P, Chiva S, et al (2015) Molecular phylogeny and ultrastructure of the lichen  
631 microalga *Asterochloris mediterranea* sp. nov. from Mediterranean and Canary Islands  
632 ecosystems. Int J Syst Evol Microbiol 65:1838–54. doi: 10.1099/ijs.0.000185
- 633 Müller N (1996) River dynamics and floodplain vegetation and their alterations due to human impact.  
634 Large Rivers 9:477–512. doi: 10.1127/lr/9/1996/477
- 635 Muotka T, Virtanen R (1995) The stream as a habitat template for bryophytes: species' distributions  
636 along gradients in disturbance and substratum heterogeneity. Freshw Biol 33:141–160. doi:  
637 10.1111/j.1365-2427.1995.tb01156.x
- 638 Nascimbene J, Mayrhofer H, Dainese M, Bilovitz PO (2017) Assembly patterns of soil-dwelling lichens  
639 after glacier retreat in the European Alps. J Biogeogr 44:1393–1404. doi: 10.1111/jbi.12970
- 640 Nelsen MP, Gargas A (2006) Actin type I introns offer potential for increasing phylogenetic resolution  
641 in *Asterochloris* (Chlorophyta: Trebouxiophyceae). Lichenol 38:435–440. doi:  
642 10.1017/S0024282906005779
- 643 Nimis PL, Hafellner J, Roux C, et al (2018) The lichens of the Alps - An annotated checklist. MycoKeys  
644 31:1–634. doi: 10.3897/mycokeys.31.23658
- 645 Ohmura Y, Takeshita S, Kawachi M (2019) Photobiont diversity within populations of a vegetatively  
646 reproducing lichen, *Parmotrema tinctorum*, can be generated by photobiont switching.  
647 Symbiosis 77:59–72. doi: 10.1007/s13199-018-0572-1
- 648 Oksanen J, Blanchet FG, Friendly M, et al (2019) vegan: Community Ecology Package
- 649 Onuț-Brännström I, Benjamin M, Scofield DG, et al (2018) Sharing of photobionts in sympatric  
650 populations of *Thamnolia* and *Cetraria* lichens: evidence from high-throughput sequencing. Sci  
651 Reports 2018 8:4406. doi: 10.1038/s41598-018-22470-y
- 652 Paul F, Otte J, Schmitt I, Dal Grande F (2018) Comparing Sanger sequencing and high-throughput

- 653 metabarcoding for inferring photobiont diversity in lichens. *Sci Rep* 8:8624. doi:  
654 10.1038/s41598-018-26947-8
- 655 Peksa O, Škaloud P (2011) Do photobionts influence the ecology of lichens? A case study of  
656 environmental preferences in symbiotic green alga *Asterochloris* (Trebouxiophyceae). *Mol Ecol*  
657 20:3936–48. doi: 10.1111/j.1365-294X.2011.05168.x
- 658 Pettit NE, Froend RH (2001) Variability in flood disturbance and the impact on riparian tree  
659 recruitment in two contrasting river systems. *Wetl Ecol Manag* 9:13–25. doi:  
660 10.1023/A:1008471100136
- 661 Piercey-Normore MD, DePriest PT (2001) Algal Switching among Lichen Symbioses. *Am J Bot*  
662 88:1490–1498. doi: 10.2307/3558457
- 663 Plummer M (2003) JAGS: A program for analysis of Bayesian graphical models using Gibbs sampling
- 664 Prach K, Petřík P, Brož Z, Song JS (2014) Vegetation Succession on River Sediments along the Nakdong  
665 River, South Korea. *Folia Geobot* 49:507–519. doi: 10.1007/s12224-014-9195-3
- 666 Prach K, Tichý L, Lencová K, et al (2016) Does succession run towards potential natural vegetation?  
667 An analysis across seres. *J Veg Sci* 27:515–523. doi: 10.1111/jvs.12383
- 668 R Core Team (2017) R: A Language and Environment for Statistical Computing
- 669 Rambold G, Friedl T, Beck A (1998) Photobionts in Lichens: Possible Indicators of Phylogenetic  
670 Relationships? *Bryol* 101:392–397
- 671 Řídká T, Peksa O, Rai H, Upreti DK (2014) Photobiont Diversity in Indian *Cladonia* Lichens, with Special  
672 Emphasis on the Geographical Patterns. In: Rai H, Upreti DK (eds) *Terricolous Lichens in India*.  
673 Springer New York, New York, NY, pp 53–71
- 674 Rippin M, Borchhardt N, Williams L, et al (2018) Genus richness of microalgae and Cyanobacteria in  
675 biological soil crusts from Svalbard and Livingston Island: morphological versus molecular  
676 approaches. *Polar Biol* 41:909–923. doi: 10.1007/s00300-018-2252-2
- 677 Rolshausen G, Dal Grande F, Sadowska-Deś AD, et al (2017) Quantifying the climatic niche of  
678 symbiont partners in a lichen symbiosis indicates mutualist-mediated niche expansions.  
679 *Ecography (Cop)* 1–12. doi: 10.1111/ecog.03457
- 680 Romeike J, Friedl T, Helms G, Ott S (2002) Genetic Diversity of Algal and Fungal Partners in Four  
681 Species of *Umbilicaria* (Lichenized Ascomycetes) Along a Transect of the Antarctic Peninsula.  
682 *Mol Biol* 19:1209–1217
- 683 Ruprecht U, Brunauer G, Türk R (2014) High photobiont diversity in the common European soil crust  
684 lichen *Psora decipiens*. *Biodivers Conserv* 23:1771–1785. doi: 10.1007/s10531-014-0662-1
- 685 Sadowsky A, Hussner A, Ott S (2012) Submersion tolerance in a habitat of *Stereocaulon paschale*  
686 (*Stereocaulaceae*) and *Cladonia stellaris* (*Cladoniaceae*) from the high mountain region  
687 Rondane, Norway. *Nov Hedwigia* 94:323–334. doi: 10.1127/0029-5035/2012/0014
- 688 Seckbach J, Grube M (eds) (2010) *Symbioses and Stress*. Springer Netherlands, Dordrecht
- 689 Sheng M, Chen X, Zhang X, et al (2017) Changes in arbuscular mycorrhizal fungal attributes along a  
690 chronosequence of black locust (*Robinia pseudoacacia*) plantations can be attributed to the  
691 plantation-induced variation in soil properties. *Sci Total Environ* 599–600:273–283. doi:  
692 10.1016/j.scitotenv.2017.04.199
- 693 Škaloud P, Peksa O (2010) Evolutionary inferences based on ITS rDNA and actin sequences reveal  
694 extensive diversity of the common lichen alga *Asterochloris*. *Mol Phylogenet Evol* 54:36–46. doi:

- 695 10.1016/j.ympcv.2009.09.035
- 696 Škaloud P, Steinová J, Řídká T, et al (2015) Assembling the challenging puzzle of algal biodiversity:  
697 species delimitation within the genus *Asterochloris* (Trebouxiophyceae, Chlorophyta). *J Phycol*  
698 51:507–527. doi: 10.1111/jpy.12295
- 699 Steinová J, Škaloud P, Yahr R, et al (2019) Reproductive and dispersal strategies shape the diversity of  
700 mycobiont-photobiont association in *Cladonia* lichens. *Mol Phylogenet Evol* 134:226–237. doi:  
701 10.1016/j.ympcv.2019.02.014
- 702 Stöcklin J (1999) Differences in life history traits of related *Epilobium* species: Clonality, seed size and  
703 seed number. *Folia Geobot* 34:7–18. doi: 10.1007/BF02803073
- 704 Stöcklin J, Bäumler E (1996) Seed rain, seedling establishment and clonal growth strategies on a  
705 glacier foreland. *J Veg Sci* 7:45–56. doi: 10.2307/3236415
- 706 Stretch R., Viles H. (2002) The nature and rate of weathering by lichens on lava flows on Lanzarote.  
707 *Geomorphology* 47:87–94. doi: 10.1016/S0169-555X(02)00143-5
- 708 Su Y-S, Yajima M (2009) R Package “R2jags: A Package for Running jags from R”
- 709 Swofford DL (2003) PAUP\*. Phylogenetic Analysis Using Parsimony (\*and Other Methods)
- 710 Tamura K, Stecher G, Peterson D, et al (2013) MEGA6: Molecular Evolutionary Genetics Analysis  
711 version 6.0. *Mol Biol Evol* 30:2725–2729. doi: 10.1093/molbev/msm092
- 712 Tichý L (2002) JUICE, software for vegetation classification. *J Veg Sci* 13:451–453. doi:  
713 10.1111/j.1654-1103.2002.tb02069.x
- 714 Tockner K, Malard F (2003) Channel Typology. In: *Ecology of a Glacial Flood Plain*. Springer  
715 Netherlands, Dordrecht, pp 57–73
- 716 Tockner K, Malard F, Ward J V (2000) An extension of the flood pulse concept. *Hydrological Processes*  
717 14:2861–2883
- 718 Tockner K, Paetzold A, Karaus U, et al (2006) Ecology of Braided Rivers. In: Smith GHS, Best JL,  
719 Bristow CS, Petts GE (eds) *Braided Rivers*. Blackwell Publishing Ltd., Oxford, UK, pp 339–359
- 720 Vančurová L, Muggia L, Peksa O, et al (2018) The complexity of symbiotic interactions influences the  
721 ecological amplitude of the host: A case study in *Stereocaulon* (lichenized Ascomycota). *Mol*  
722 *Ecol* 27:3016–3033. doi: 10.1111/mec.14764
- 723 Vančurová L, Peksa O, Němcová Y, Škaloud P (2015) *Vulcanochloris* (Trebouxiiales,  
724 Trebouxiophyceae), a new genus of lichen photobiont from La Palma, Canary Islands, Spain.  
725 *Phytotaxa* 219:118–132. doi: 10.11646/phytotaxa.219.2.2
- 726 Vitt DH, Glime JM, Lafarge England C (1986) Bryophyte vegetation and habitat gradients of montane  
727 streams in western Canada. *Hikobia* 9:367–386
- 728 Walker LR, del Moral R (2003) *Primary Succession and Ecosystem Rehabilitation*. Cambridge  
729 University Press, Cambridge
- 730 Ward J V, Tockner K, Arscott DB, Claret C (2002) Riverine landscape diversity. *Freshw Biol* 47:517–  
731 539. doi: <https://doi.org/10.1046/j.1365-2427.2002.00893.x>
- 732 Weber K, Kabsch W (1994) Intron Positions in Actin Genes Seem Unrelated To the Secondary  
733 Structure of the Protein. *Embo J* 13:1280–1286
- 734 Wellstein C, Uehlinger U, Zah R (2003) Terrestrial Floodplain Vegetation. In: Ward J V., Uehlinger U

- 735 (eds) Ecology of a Glacial Flood Plain. Springer Netherlands, Dordrecht, pp 109–121
- 736 Westhoff V, Van Der Maarel E (1978) The Braun-Blanquet Approach. In: Whittaker RH (ed)
- 737 Classification of Plant Communities. Springer Netherlands, Dordrecht, pp 287–399
- 738 White TJ, Bruns T, Lee S, Taylor JW (1990) Amplification and direct sequencing of fungal ribosomal
- 739 RNA genes for phylogenetics. In: Innis MA, Gelfand DH, Sninsky JJ, White TJ (eds) PCR Protocols:
- 740 A Guide to Methods and Applications. Academic Press, San Diego, pp 315–322
- 741 Yahr R, Vilgalys R, Depriest PT (2004) Strong fungal specificity and selectivity for algal symbionts in
- 742 Florida scrub *Cladonia* lichens. Mol Ecol 13:3367–3378. doi: 10.1111/j.1365-294X.2004.02350.x
- 743 Yahr R, Vilgalys R, DePriest PT (2006) Geographic variation in algal partners of *Cladonia subtenuis*
- 744 (Cladoniaceae) highlights the dynamic nature of a lichen symbiosis. New Phytol 171:847–60.
- 745 doi: 10.1111/j.1469-8137.2006.01792.x
- 746 Zwickl DJ (2006) Genetic algorithm approaches for the phylogenetic analysis of large biological
- 747 sequence datasets under the maximum likelihood criterion. The University of Texas at Austin

## 748 Figures

749 **Fig. 1** Phylogenetic hypothesis of *Asterochloris* resulting from the Bayesian analysis of combined ITS

750 rDNA and actin type I sequences. Values at the nodes indicate the statistical supports of Bayesian

751 posterior probability (left), maximum-likelihood bootstrap (middle) and maximum parsimony

752 bootstrap (right). Fully supported branches (1.0/100/100) are marked with an asterisk. Scale bar

753 shows the estimated number of substitutions per site. Newly obtained sequences are in boxes. Clade

754 affiliations: clade 8, clade 9 *sensu* Škaloud and Peksa (2010), A4, A9, A11 *sensu* Peksa and Škaloud

755 (2011), URa14 *sensu* Ruprecht et al. (2014), I1, I2 *sensu* Řídká et al. (2014), S1, S3 *sensu* Nelsen and

756 Gargas (2006), *A. aff. irregularis*, *A. aff. italiana* and StA1 – StA8 *sensu* Vančurová et al. (2018). StA9

757 lineage was identified as new in present study. Online Resource 1/Table S6 contains accession

758 numbers of reference sequences retrieved from GenBank

759 **Fig. 2** Phylogenetic hypothesis of *Stereocaulon* resulting from the Bayesian analysis of ITS rDNA.

760 Values at the nodes indicate the statistical supports of Bayesian posterior probability (left),

761 maximum-likelihood bootstrap (middle) and maximum parsimony bootstrap (right). Scale bar shows

762 the estimated number of substitutions per site. Newly obtained sequences are in boxes. All new

763 sequences are belonging to Group 8b *sensu* Högnabba (2006), as marked

764 **Fig. 3** Bipartite association network between study plots and phycobiont species-level lineages. The

765 width of the links is proportional to the number of specimens forming the association

766 **Fig. 4** Bayesian linear regression of number of accompanying lichen species as a predictor of the

767 number of phycobionts associated with mycobiont OTU35 down-sampled to **a** sample size of 5, **b**

768 sample size of 10 per plot. Dashed lines show the 95% CRI around the regression line

769 **Fig. 5** Bayesian linear regression of number of a succession stage as a predictor of the proportion of

770 the most abundant phycobiont species-level lineages ((number of *Asterochloris phycobiontica*

771 samples + number of StA5 lineage samples)/number of all samples). Dashed lines show the 95% CRI

772 around the regression line

773 **Fig 6** Ordination diagrams of principle coordinate analyses of community composition of vascular

774 plants (a, b, c) and bryophytes + lichens (d, e, f). Colors and symbols indicate the proxy of

775 successional development (in case of a and d it is the cover of shrubs being higher than 10%; in case

776 of b and e it is the cover of crustose lichens being higher than 10%). Plots c and f show the passively

777 superimposed environmental and biological variables. Ellenberg-type indicator values (EIVs) for light

778 and temperature are calculated for vascular plants in case of plot c and for bryophytes in case of plot  
779 f. On axis labels the variation explained by particular ordination axis is given.

780 **Fig 7** Ordination diagram (principle coordinate analysis) of procrustes distances between individual  
781 taxa groups. The diagram shows the difference in response of communities of individual taxa groups  
782 to ecological gradients covered by the sampled dataset. On axis labels the variation explained by  
783 particular ordination axis is given.

784 **Fig. 8** Eight *Stereocaulon* thalli selected for Illumina metabarcoding and abundances of recovered  
785 algal clades. A523M, A554M, A563M, A570M belong to mycobiont OTU35. A597M, A598M, A633M,  
786 A634M belong to mycobiont OTU2. Clade affiliations: URa25, URa28 *sensu* Ruprecht et al. (2014).  
787 Clades VII and XVIII were identified as new in present study. Amplicon sequence variants (ASVs) were  
788 sorted into these clades based on phylogenetic hypothesis presented in Online Resource 2/Fig. S3.  
789 Online Resource 1/Table S7 describes relative abundance of each ASV in each sample

790 **Fig. 9** Euler diagrams depicting sets of algal ITS2 rDNA haplotypes recovered from selected  
791 *Stereocaulon* thalli (n=8) using Illumina metabarcoding, from all *Stereocaulon* samples (n=147) using  
792 Sanger sequencing and from soil samples (n=12) using Illumina metabarcoding. In case of Illumina  
793 metabarcoding sets, only haplotypes with frequency **a**  $\geq 100$  and **b**  $\geq 1000$  were included

794 **Fig. 10** Relative abundances of algal clades within soil (first line) and *Stereocaulon* (second line)  
795 samples. Solely plots 4, 5, 6, and 8 with soil samples generating >5000 algal reads and with  
796 *Stereocaulon* samples analyzed using Illumina metabarcoding were displayed. Clade affiliations:  
797 URa25, URa28 *sensu* Ruprecht et al. (2014). Clade XVIII was identified as new in present study.  
798 Amplicon sequence variants (ASVs) were sorted into these clades based on phylogenetic hypothesis  
799 presented in Online Resource 2/Fig. S3

## 800 **Supplementary material**

801 **Table S1** Location, environmental and vegetation characteristics of study plots

802 **Table S2** Species composition of gravel bar vegetation plots. Species are ranked by decreasing  
803 frequency of occurrence. The abundance of species is given on the nine-degree Braun-Blanquet  
804 scale. All relevés are stored in Gravel bar vegetation database (Kalníková and Kudrnovsky 2017)

805 **Table S3** Primers used in this study

806 **Table S4** GenBank accession numbers, phycobiont species-level lineage, mycobiont OTU, substrate  
807 and affiliation to study plot of *Stereocaulon* samples

808 **Table S5** Substitution models selected for each partition of *Asterochloris* and *Stereocaulon*  
809 (mycobiont) datasets and for algal ITS2 rDNA dataset using the Bayesian information criterion (BIC)  
810 as implemented in JModelTest2 (Guindon & Gascuel 2003, Darriba et al. 2012)

811 **Table S6** Accession numbers of *Asterochloris* reference sequences retrieved from GenBank

812 **Table S7** Relative abundance of each ASV in each *Stereocaulon* sample

813 **Fig. S1** Examples of study plots belonging to different succession stages: **a**, **b** succession stage 1 (plots  
814 5 and 9), **c** succession stage 2 (plot 2), **d** succession stage 3 (plot 3)

815 **Fig. S2** Rarefaction curves for 13 study plots. Vertical lines are drawn at sample size of n=5 and  
816 sample size of n=10

817 **Fig. S3** Phylogenetic hypothesis resulting from Bayesian analysis of the algal ITS2 rDNA sequences  
818 obtained by Illumina metabarcoding of soil samples, selected lichen samples and reference  
819 sequences from GenBank. Clade affiliations: URa25, URa28 *sensu* Ruprecht et al. (2014). Clades I–  
820 XVIII were identified as new in present study. Values at the nodes indicate the statistical supports of  
821 Bayesian posterior probability

822 **Fig. S4** Relative frequency of ASVs linked to various *Asterochloris* species. Solely samples with  
823 *Asterochloris* as a predominant phycobiont (>50% algal reads belonged to *Asterochloris*) were  
824 displayed

825 **Fig. S5** Frequency of ASVs linked to algal clades recovered from soil samples. Clade affiliations:  
826 URa25, URa28 *sensu* Ruprecht et al. (2014). Clades I–XVIII were identified as new in present study.  
827 Amplicon sequence variants (ASVs) were sorted into these clades based on phylogenetic hypothesis  
828 presented in Online Resource 2/ Fig. S3



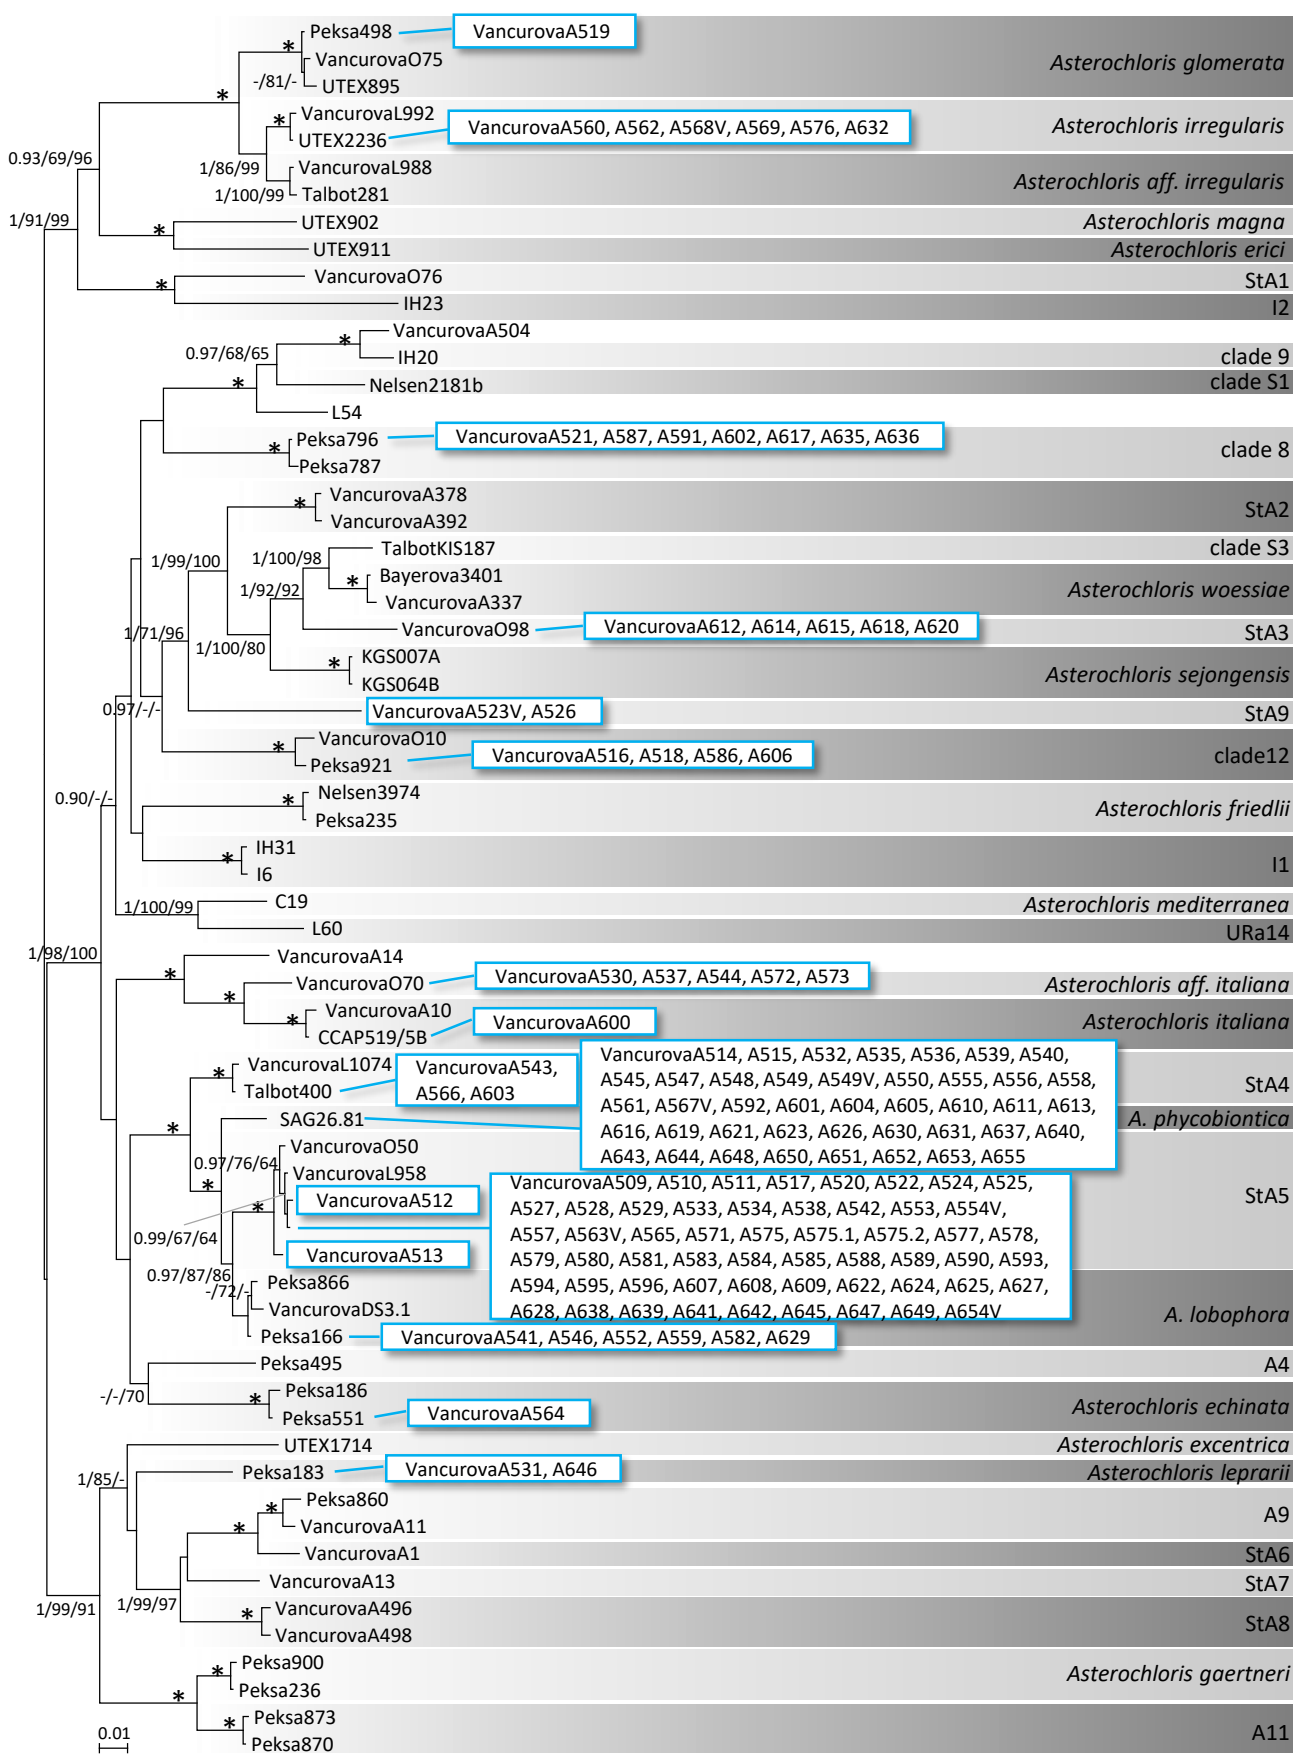

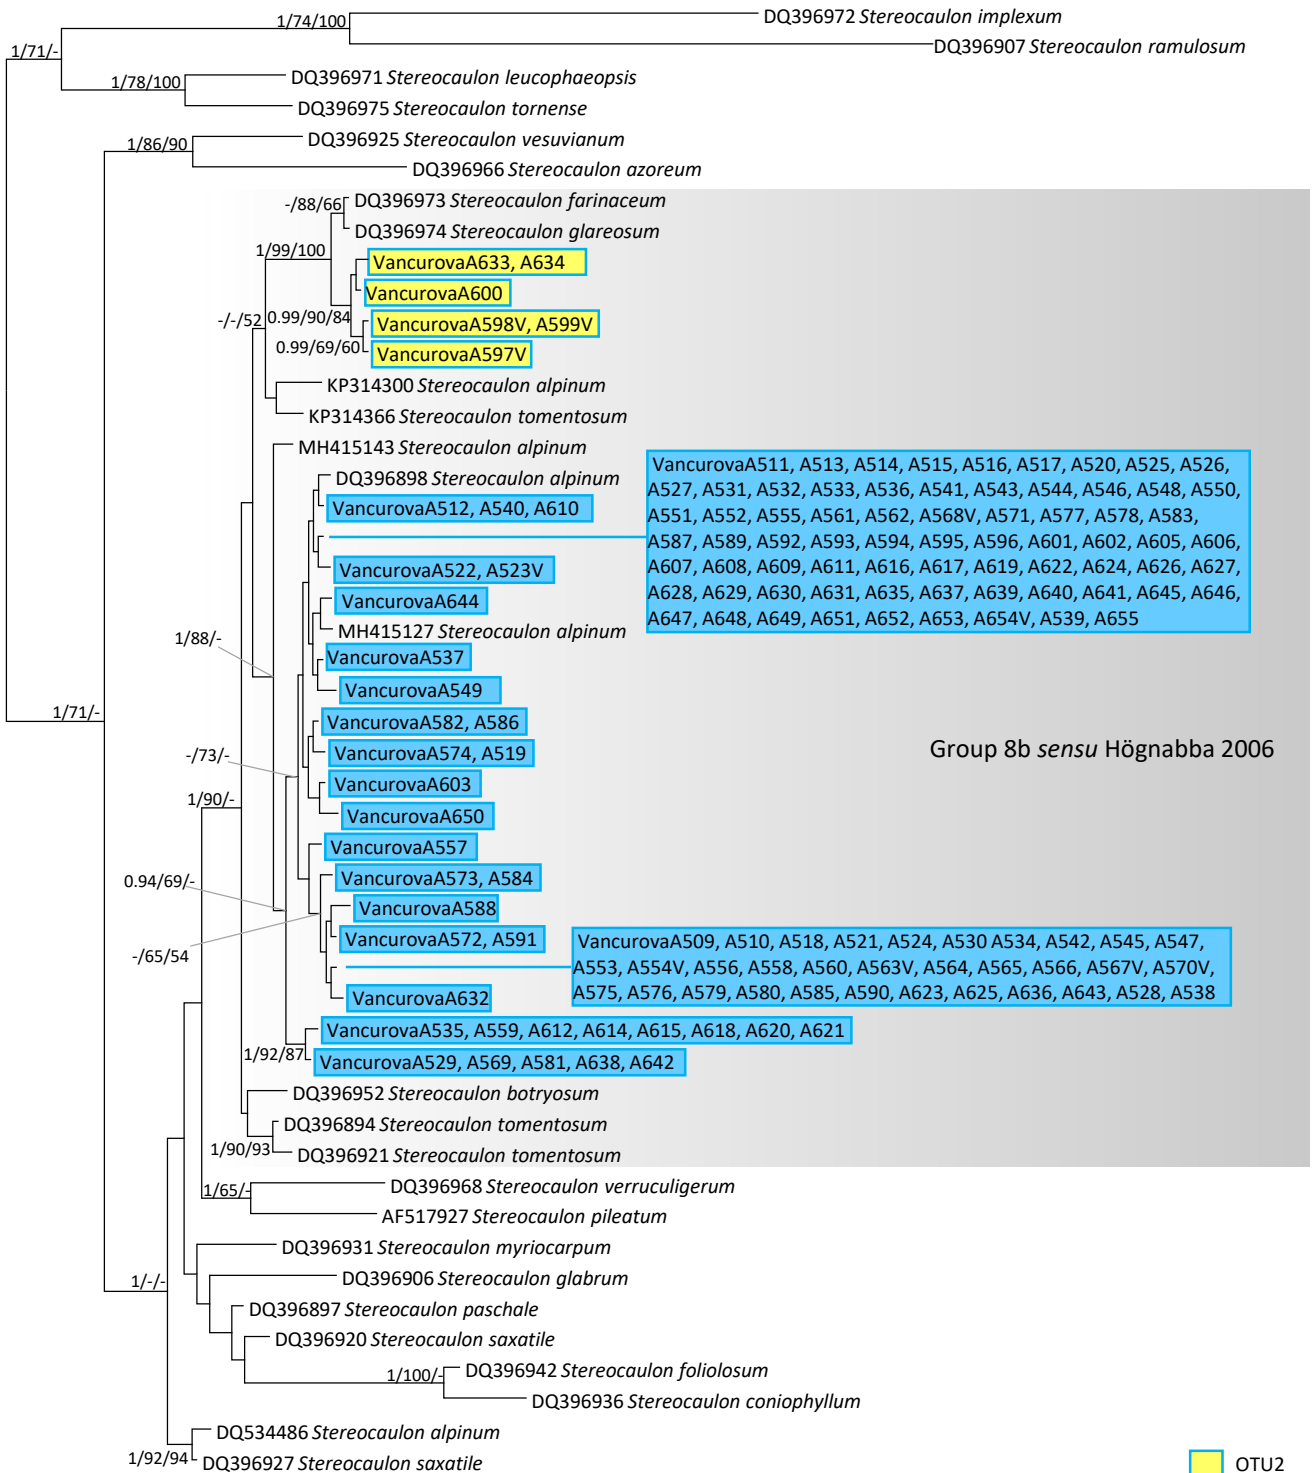

0.02

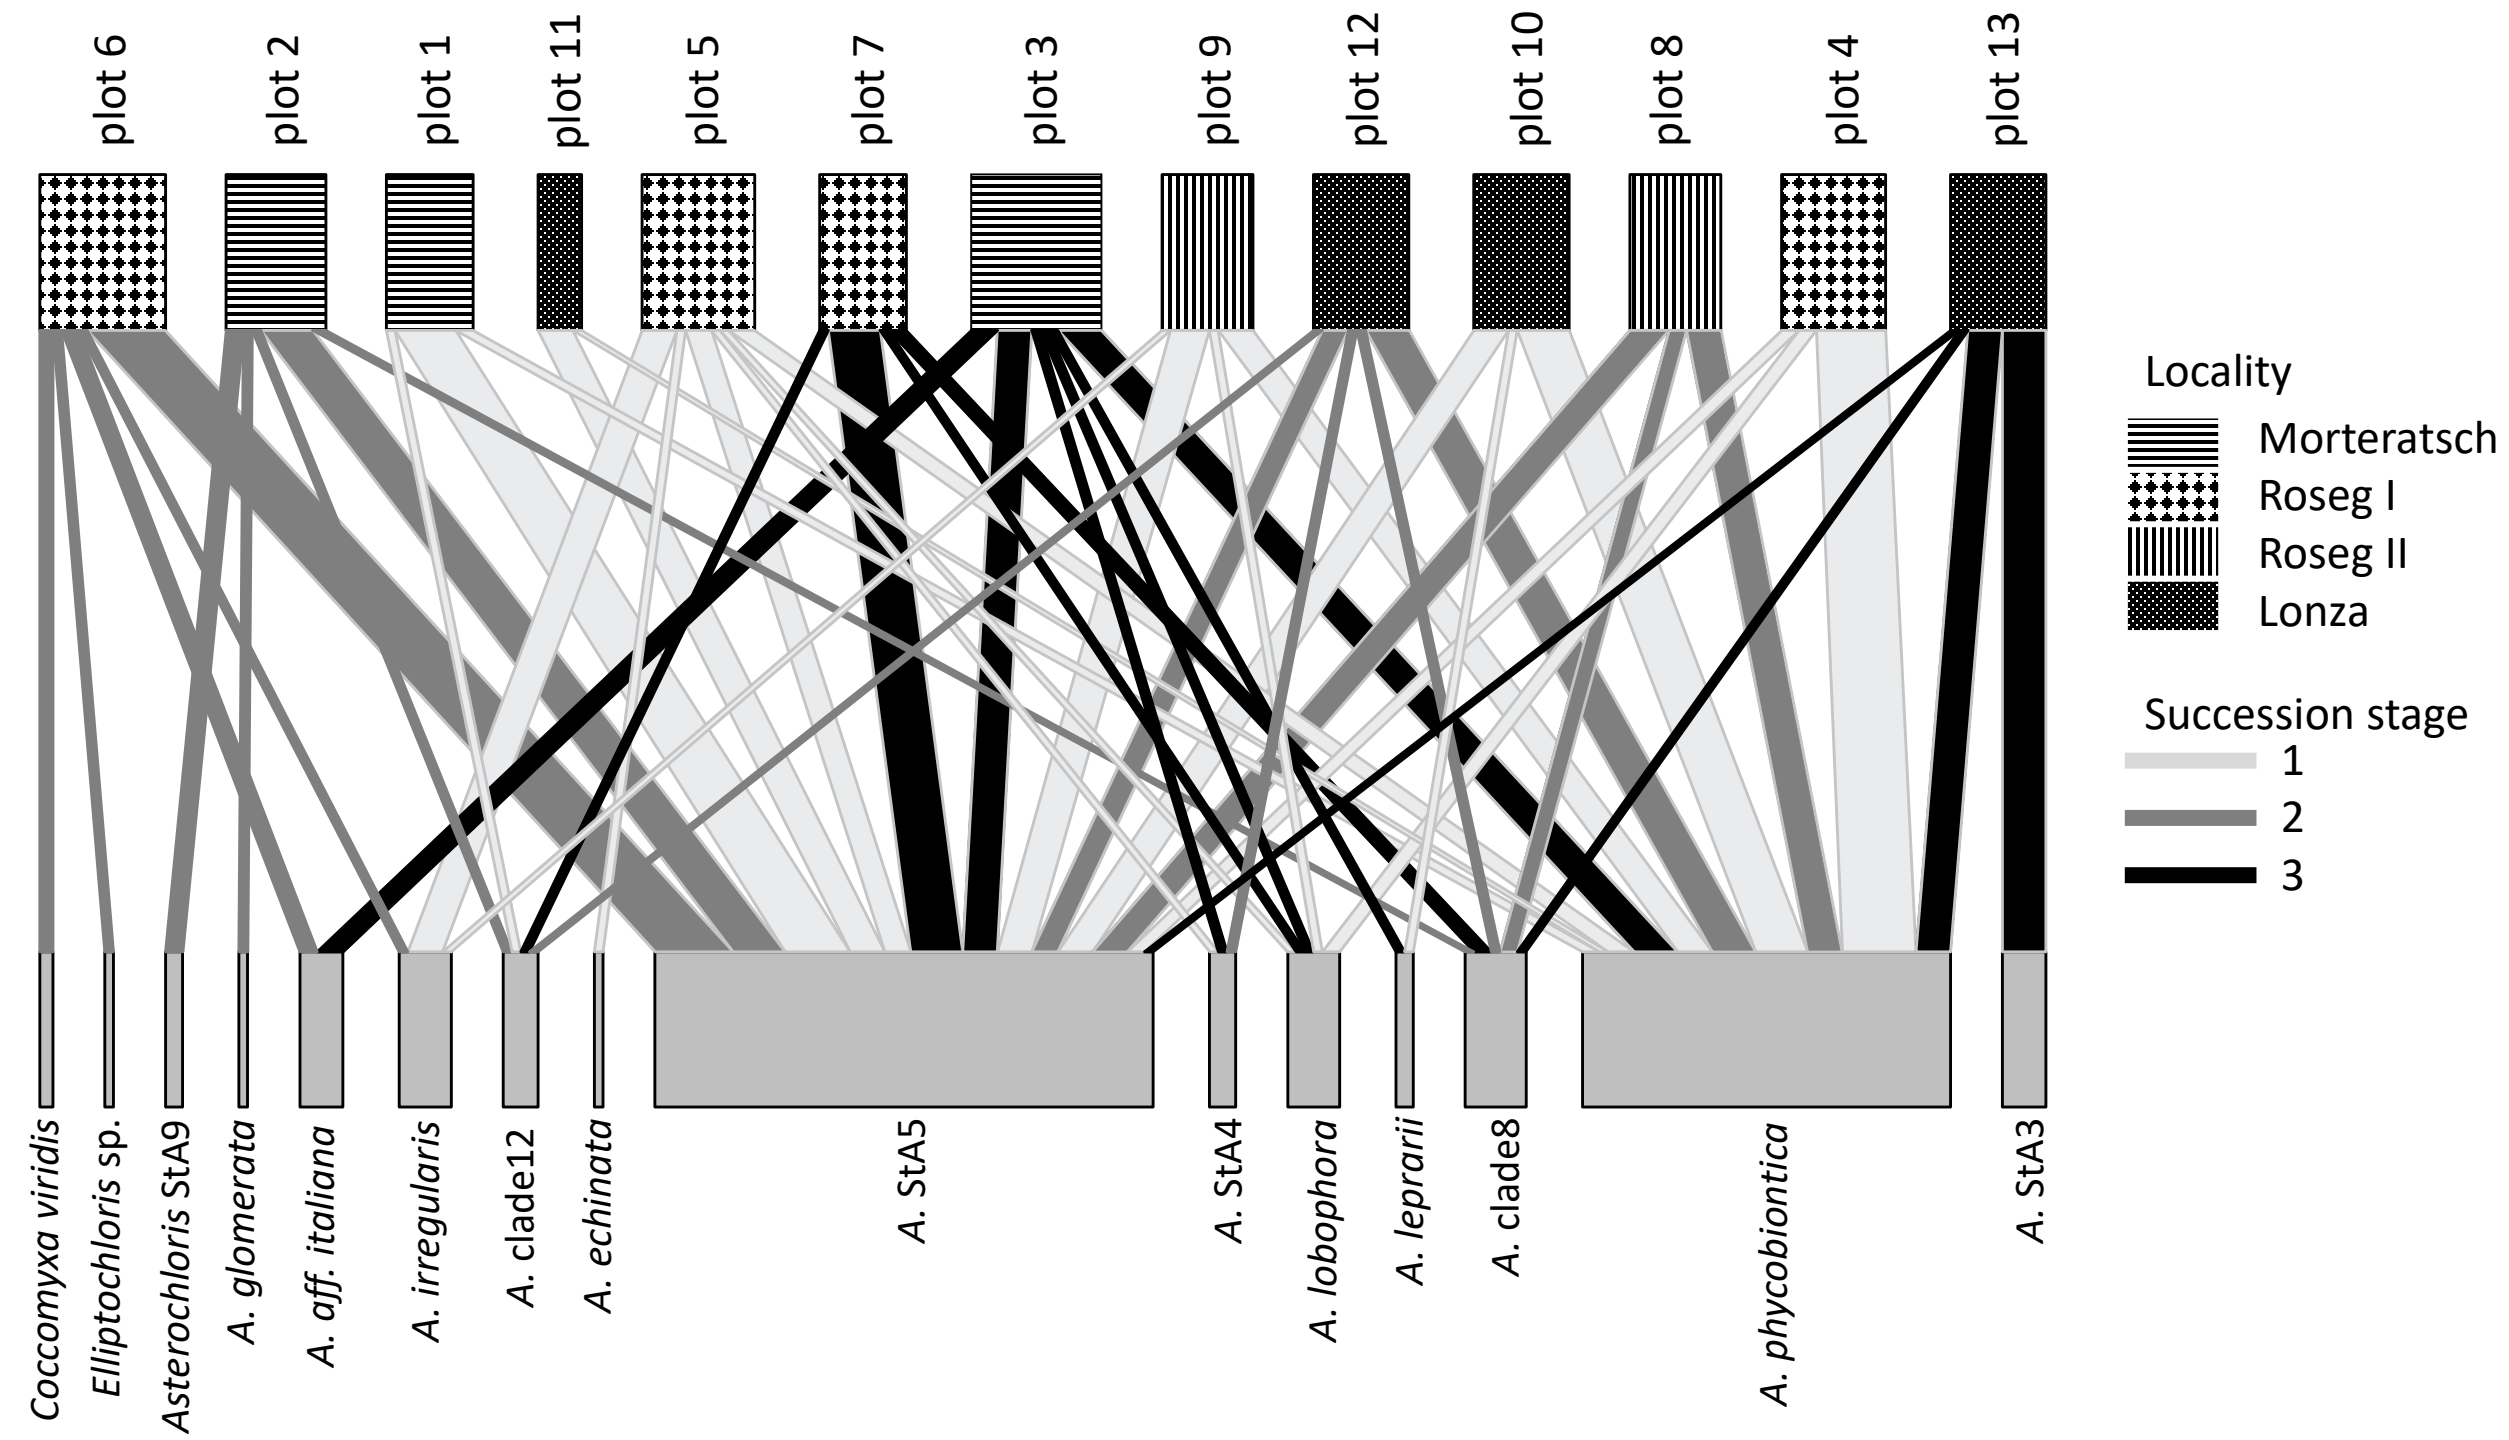

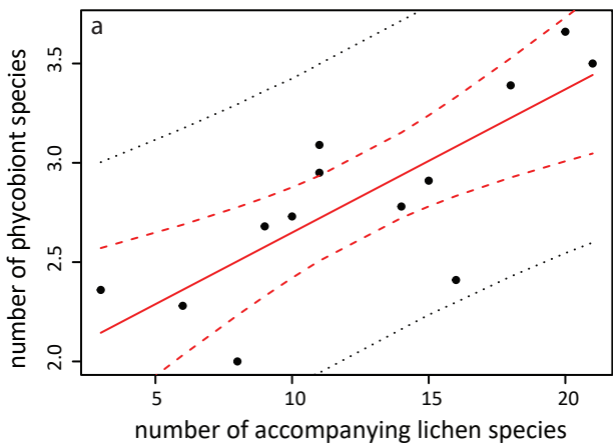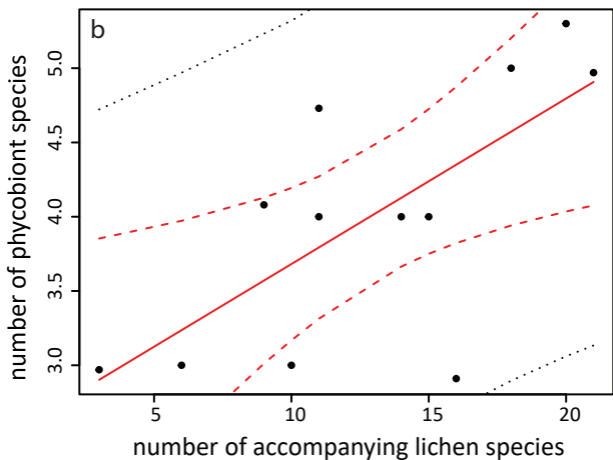

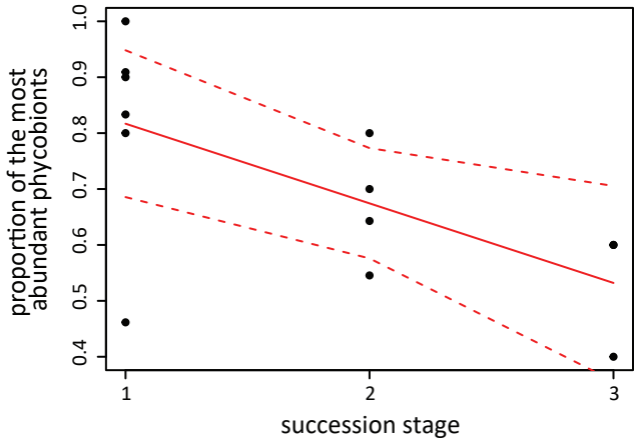

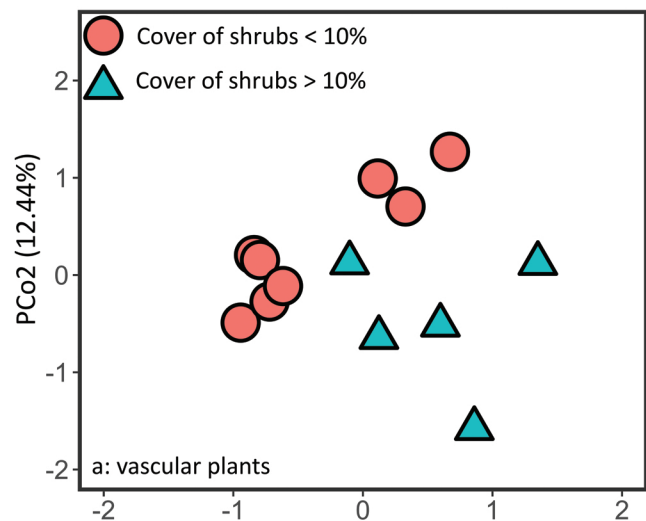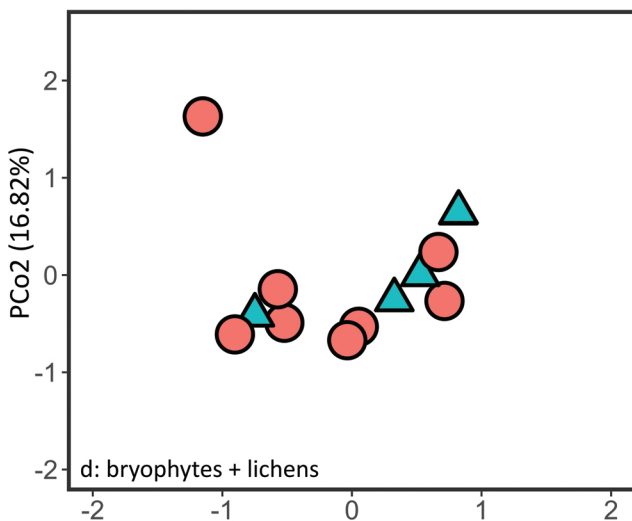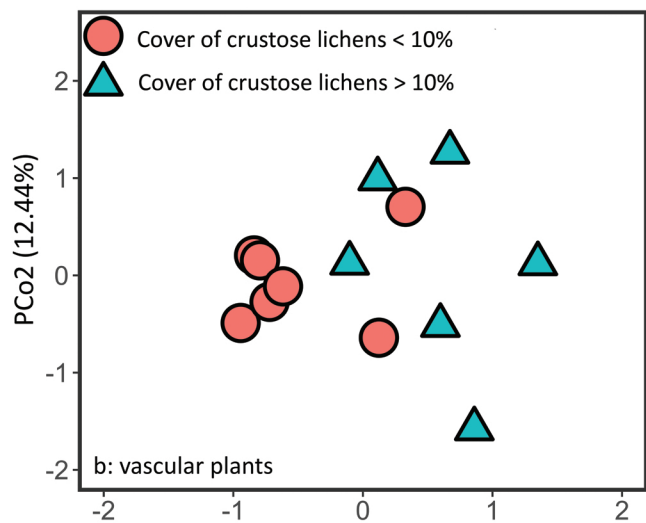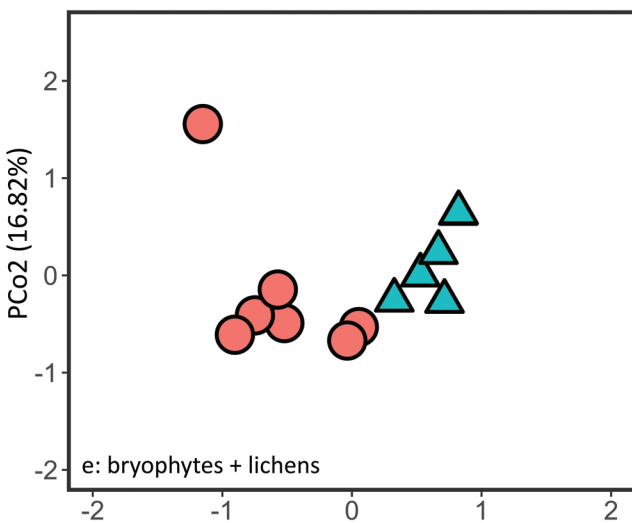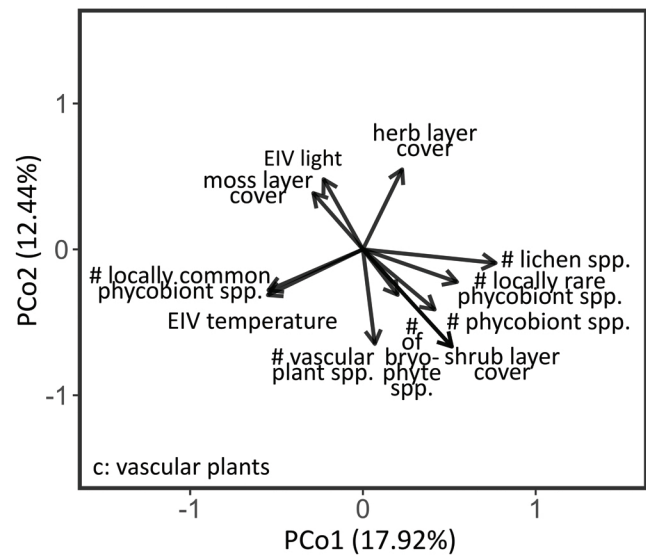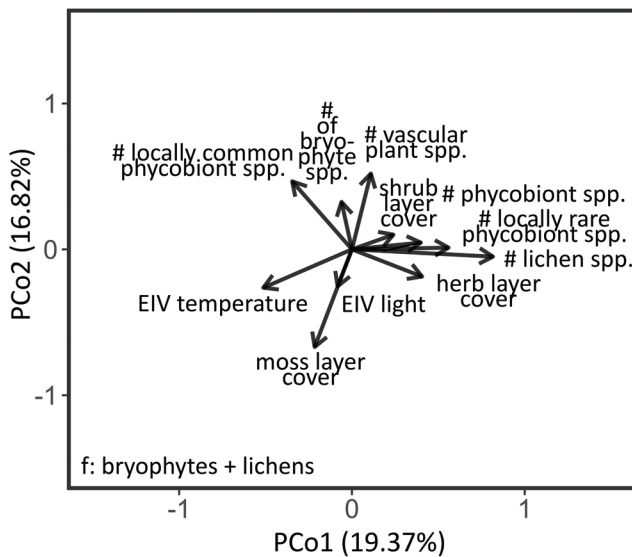

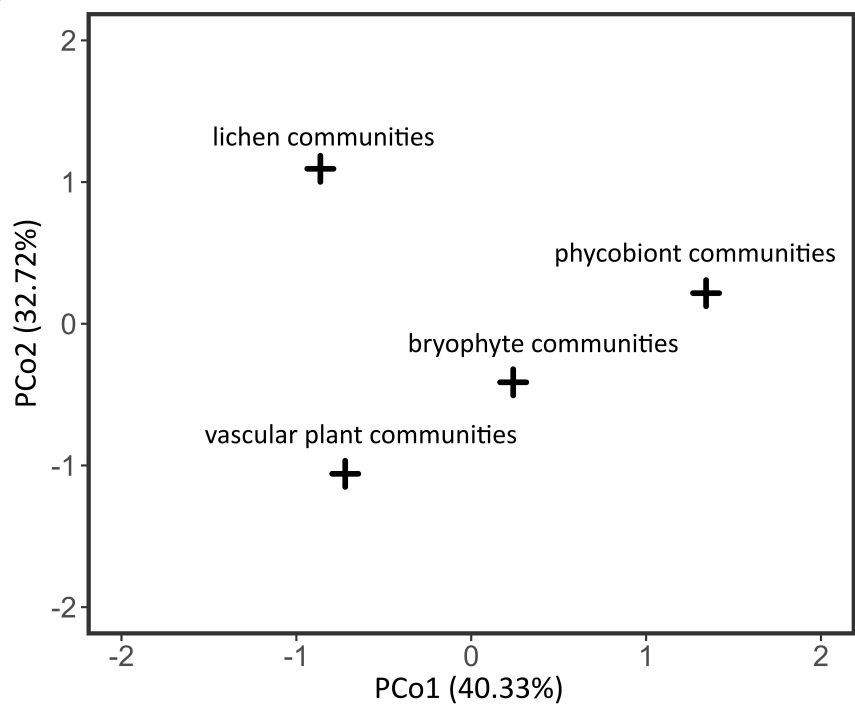





a

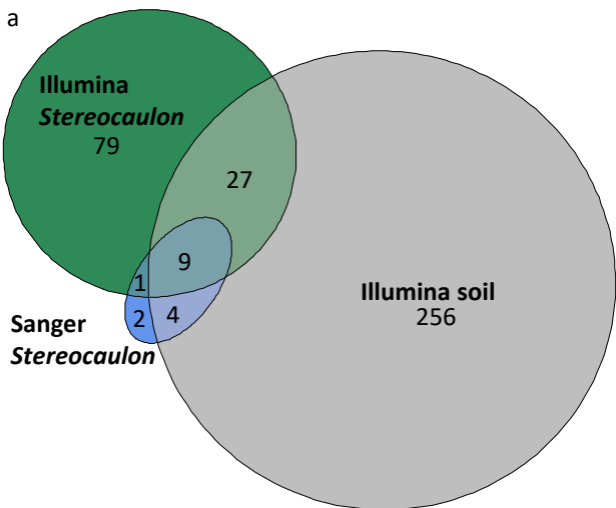

b

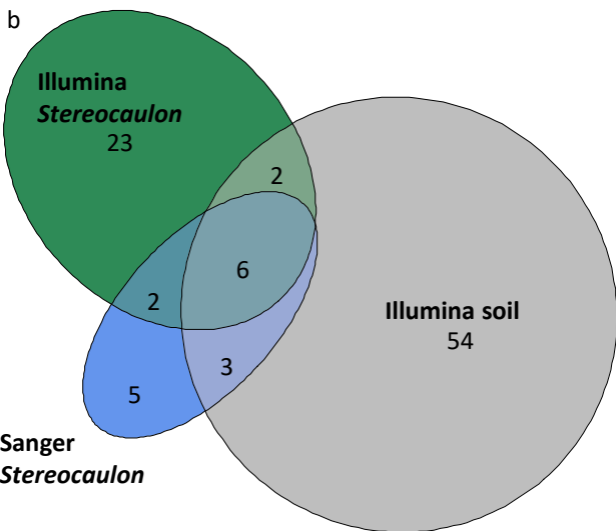

Plot 4  
Soil 4

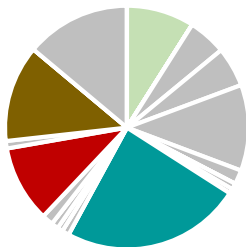

Plot 5  
Soil 5

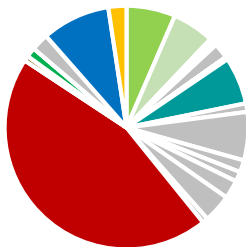

Plot 6  
Soil 6

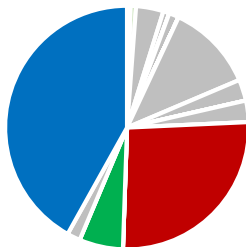

Plot 8  
Soil 8

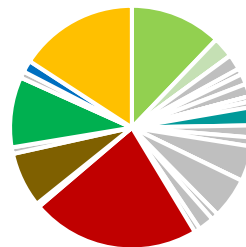

mycobiont OTU35

A554M

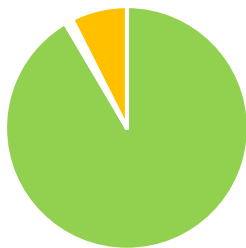

A563M

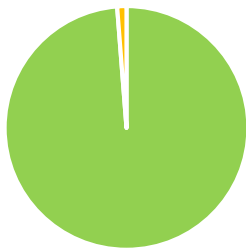

A570M

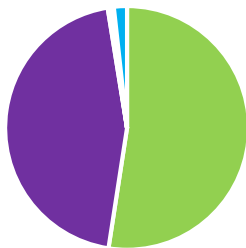

mycobiont OTU2

A597M

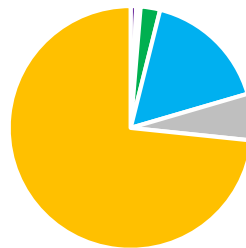

A598M

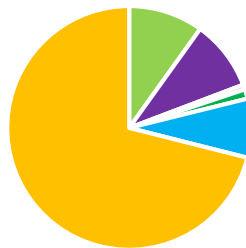

 *Asterochloris*

 *Coelastrella*

 *Parietochloris*

 *Sanguina*

 URa28

 others

 *Bracteacoccus*

 *Myrmecia*

 *Pseudochlorella*

 URa25

 Clade XVIII
