# Supplementary material for: Symbiosis between river and dry lands: phycobiont dynamics on river gravel bars
Source: bioRxiv or medRxiv preprint supplement (doi:10.1101/2020.01.29.924803), 2020-01-30
Supplement: Supplementary file [file media-2.pdf]

## **Symbiosis between river and dry lands: phycobiont dynamics on river gravel bars**

Lucie Vančurová<sup>1</sup>, Veronika Kalníková<sup>2</sup>, Ondřej Peksa<sup>3</sup>, Zuzana Škvorová<sup>1</sup>, Jiří Malíček<sup>4</sup>, Patricia Moya<sup>5</sup>, Kryštof Chytrý<sup>2</sup>, Ivana Černajová<sup>1</sup>, Pavel Škaloud<sup>1</sup>

<sup>1</sup>Charles University, Faculty of Science, Department of Botany, Benátská 2, 128 01 Prague 2, Czech Republic

<sup>2</sup>Department of Botany and Zoology, Faculty of Science, Masaryk University, Kotlářská 2, 611 37 Brno, Czech Republic

<sup>3</sup>The West Bohemian Museum in Pilsen, Kopeckého sady 2, 301 00 Plzeň, Czech Republic

<sup>4</sup>The Czech Academy of Sciences, Institute of Botany, Zámek 1, 252 43 Průhonice, Czech Republic

<sup>5</sup>Dpto. Botánica, ICBIIE Fac. CC. Biológicas, Universitat de València, Dr. Moliner, 50. 46100-Burjassot, Valencia, Spain

Corresponding author: Lucie Vančurová, Charles University, Faculty of Science, Department of Botany, Benátská 2, 128 01 Prague 2, Czech Republic, fax: +420 221 95 16 45, [lucie.vancurova@natur.cuni.cz](mailto:lucie.vancurova@natur.cuni.cz)

### **List of contents:**

|         |        |
|---------|--------|
| Fig. S1 | Page 2 |
| Fig. S2 | Page 3 |
| Fig. S3 | Page 4 |
| Fig. S4 | Page 5 |
| Fig. S5 | Page 6 |

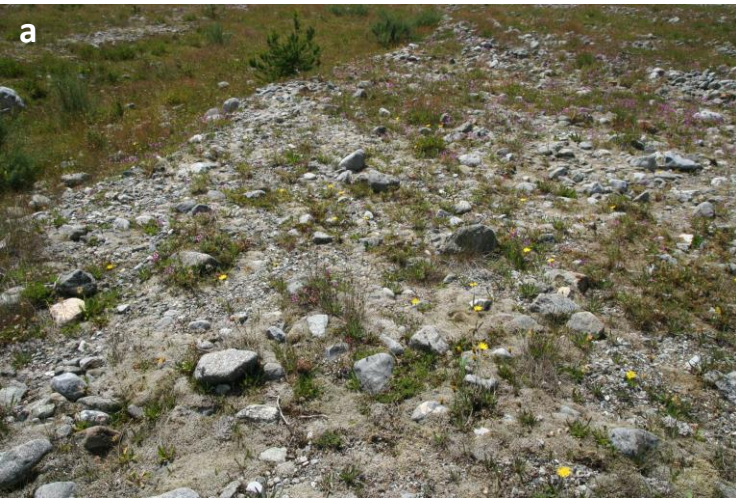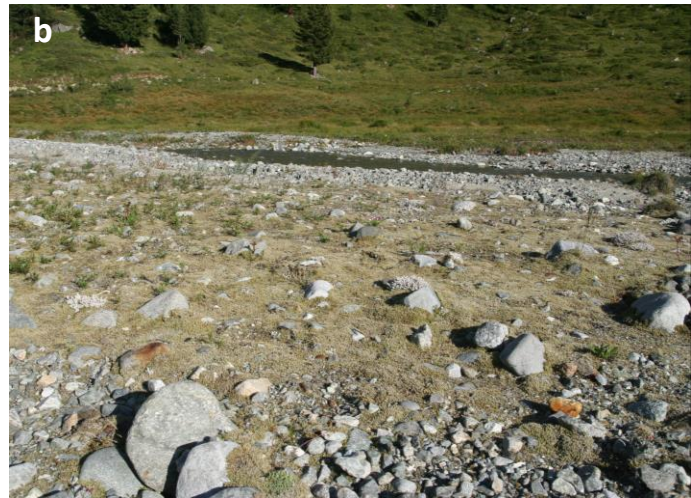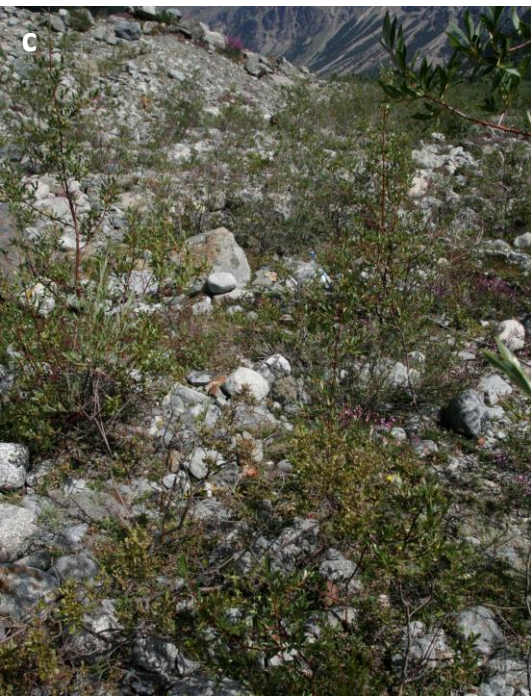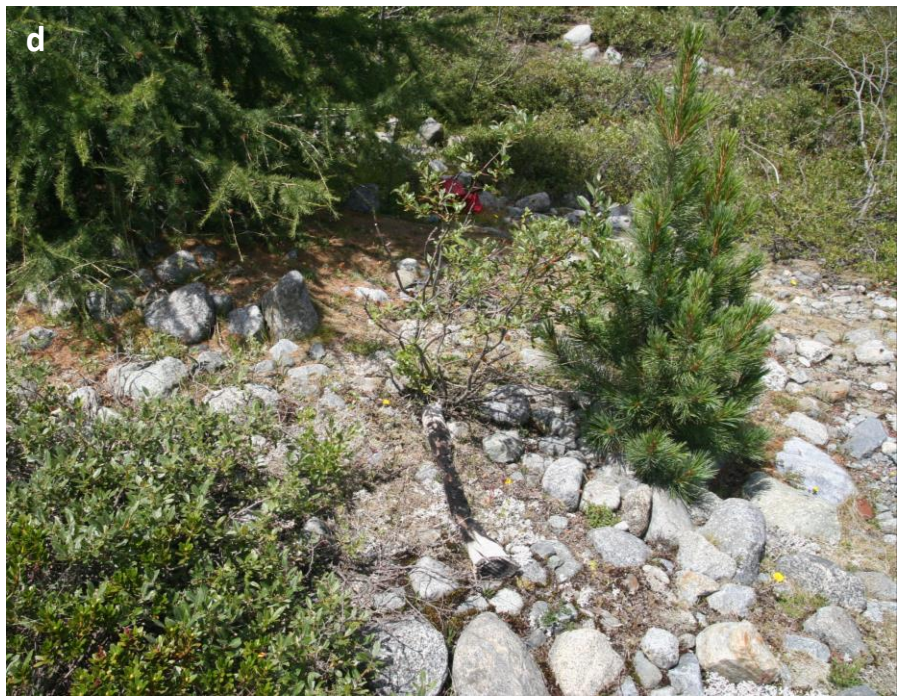

**Fig. S1** Examples of study plots belonging to different succession stages: **a, b** succession stage 1 (plots 5 and 9), **c** succession stage 2 (plot 2), **d** succession stage 3 (plot 3)

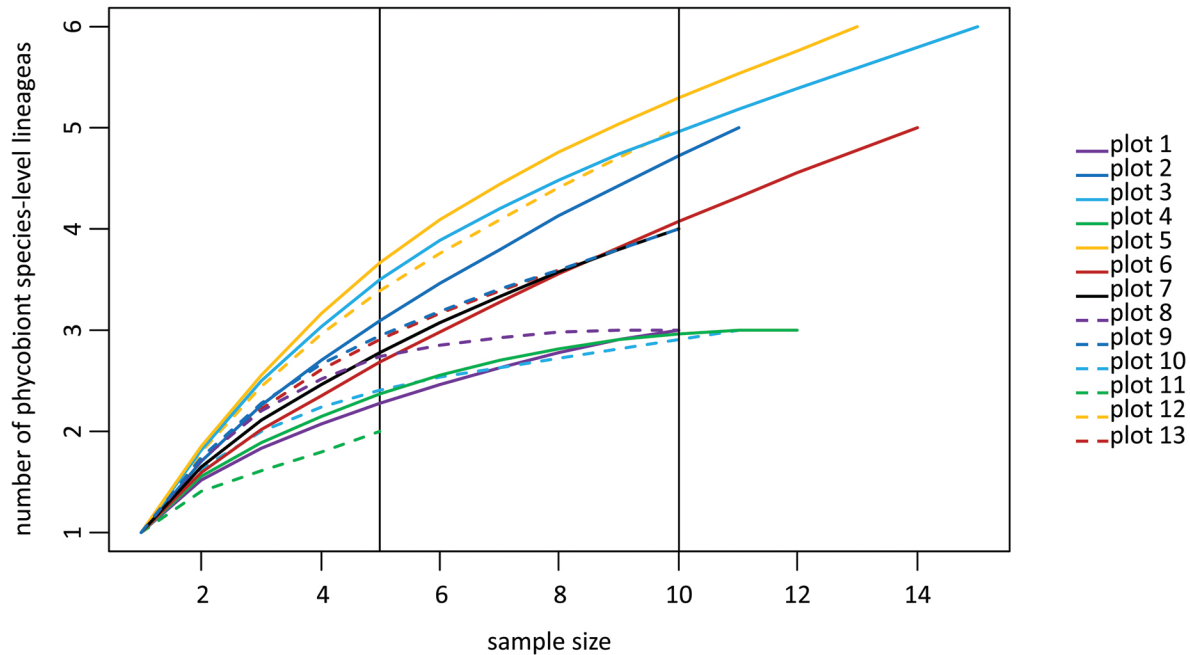

**Fig. S2** Rarefaction curves for 13 study plots. Vertical lines are drawn at sample size of  $n=5$  and sample size of  $n=10$



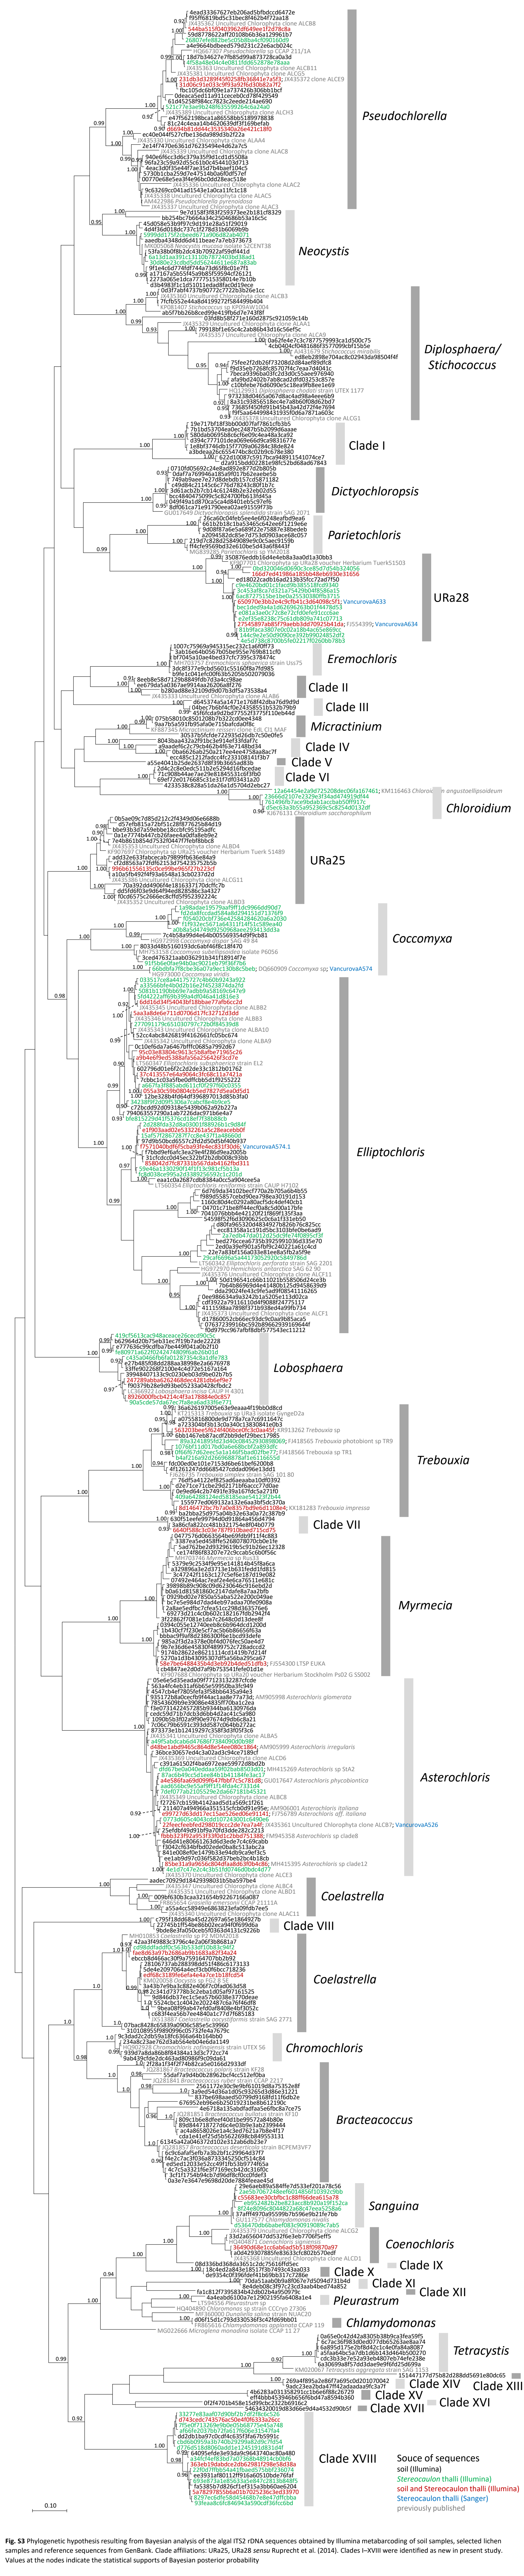

**Fig. S3** Phylogenetic hypothesis resulting from Bayesian analysis of the algal ITS2 DNA sequences obtained by Illumina metabarcoding of soil samples, selected lichen samples and reference sequences from GenBank. Clade affiliations: URa25, URa28 sensu Ruprecht et al. (2014). Clades I–XVIII were identified as new in this study. Values at the nodes indicate the statistical supports of Bayesian posterior probability



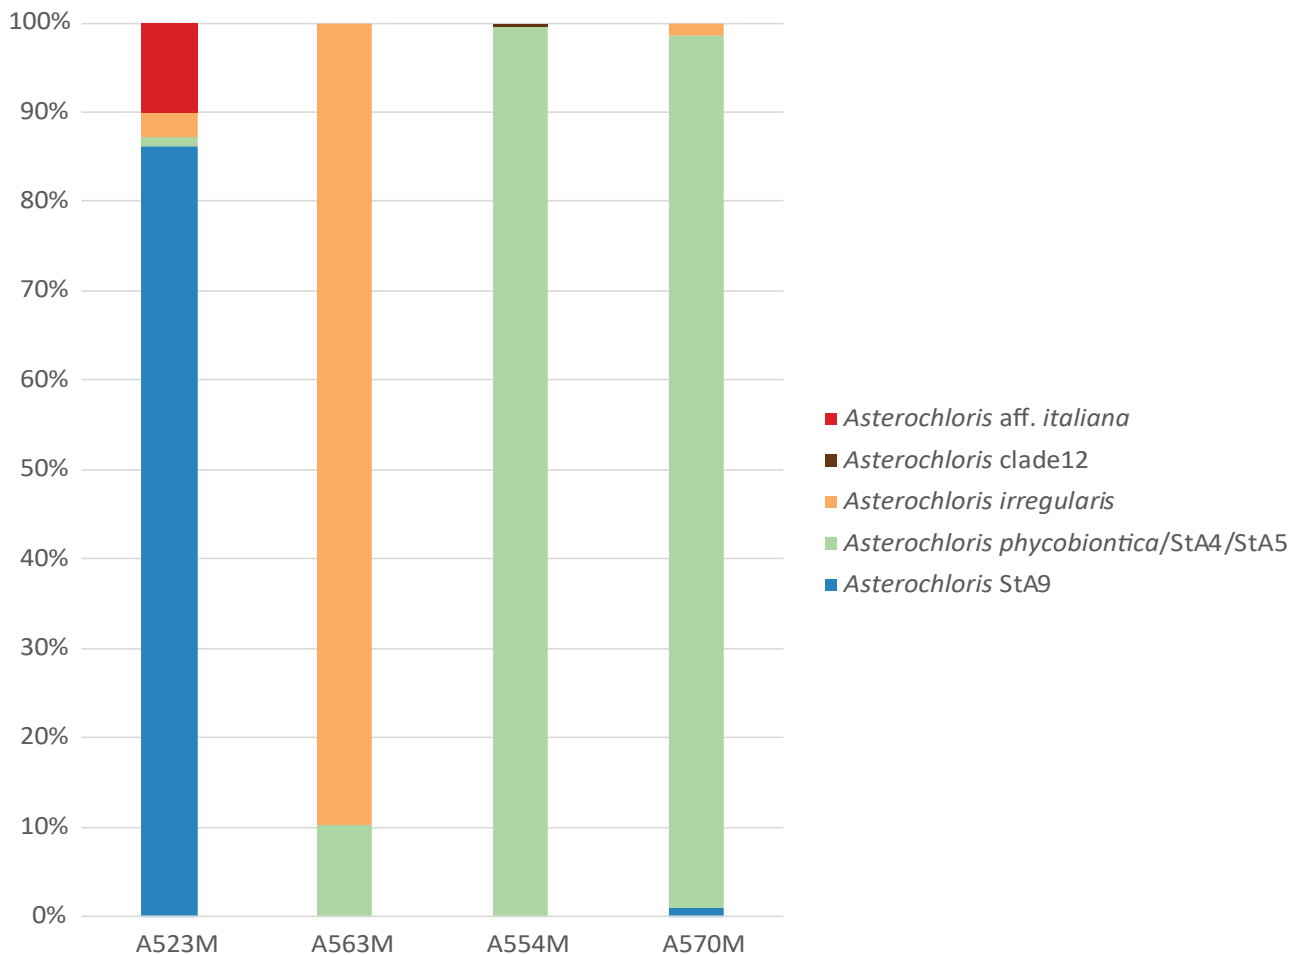

**Fig. S4** Relative frequency of ASVs linked to various *Asterochloris* species. Solely samples with *Asterochloris* as a predominant phycobiont (>50% algal reads belonged to *Asterochloris*) were displayed

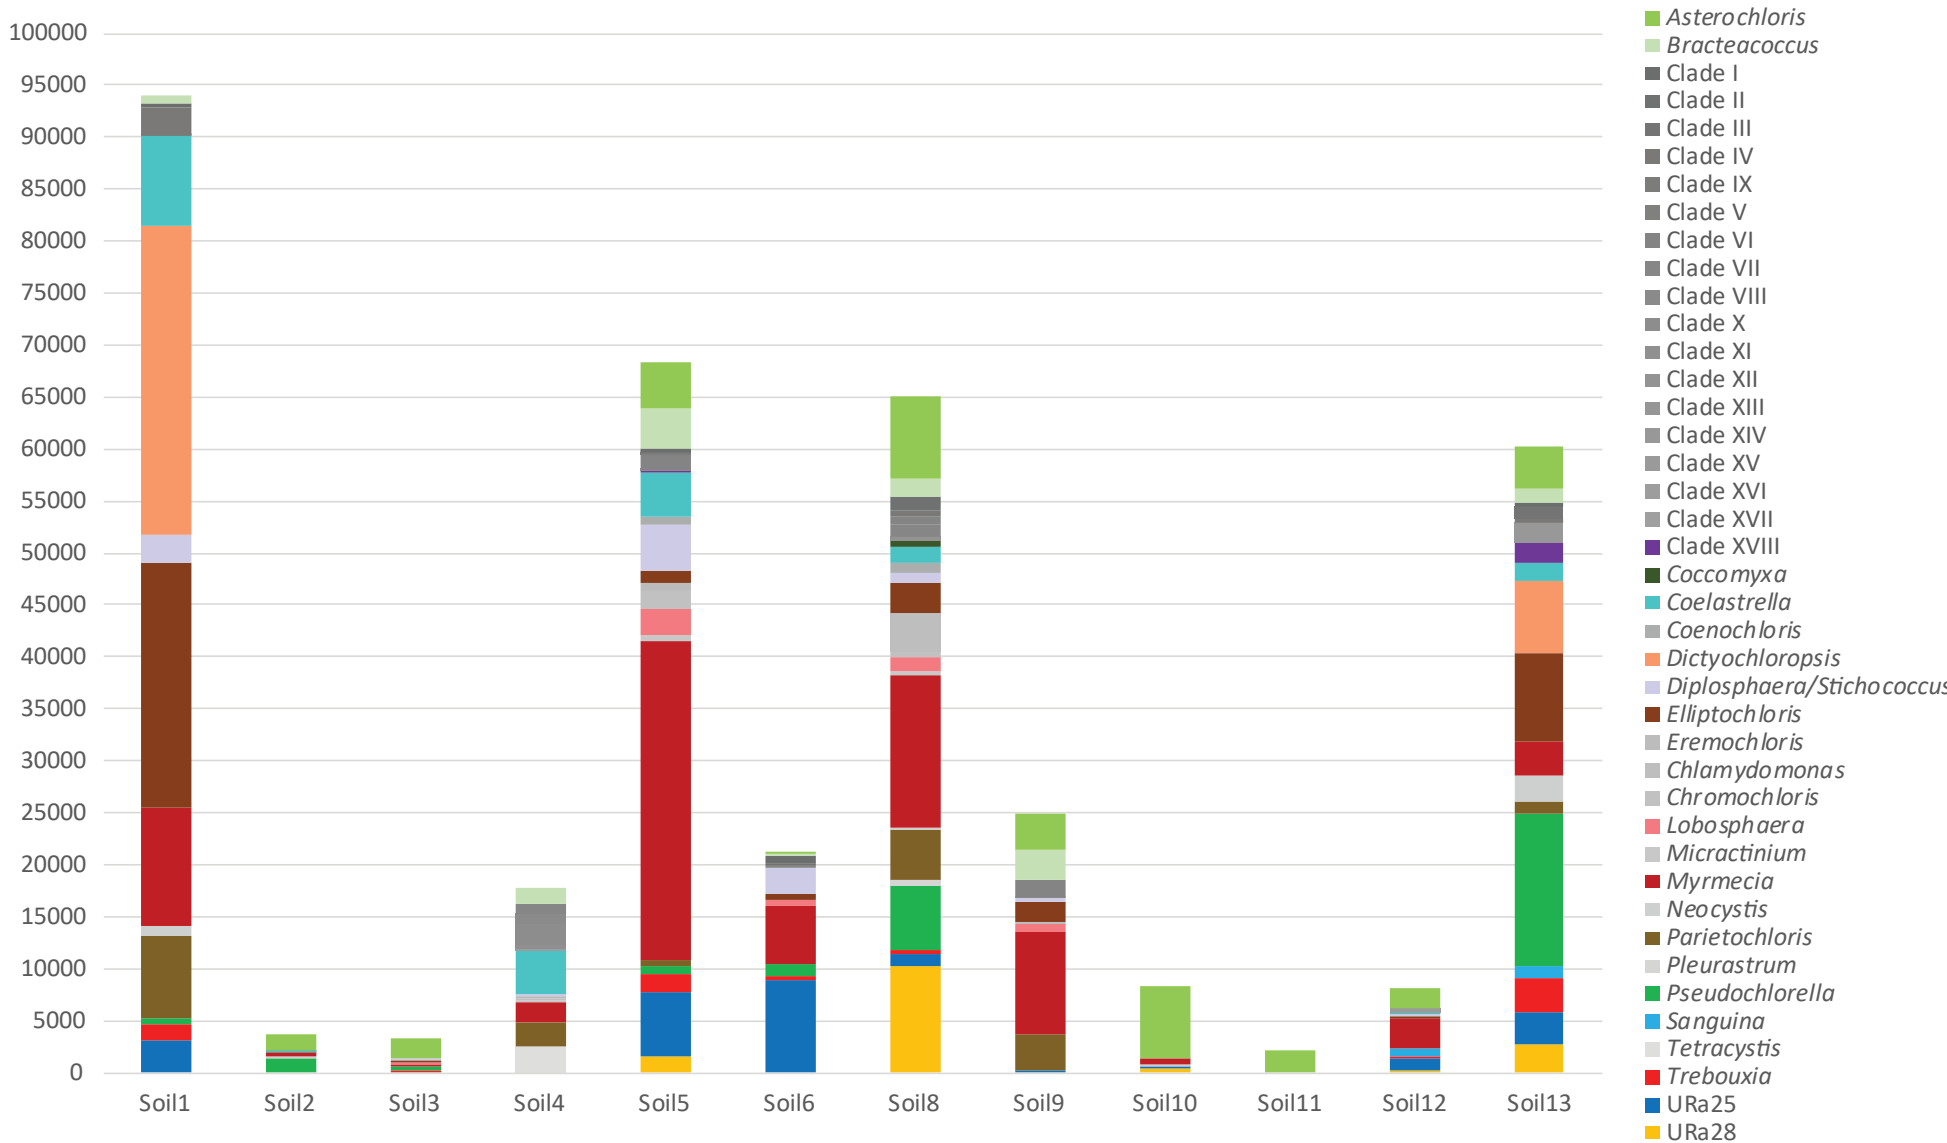

**Fig. S5** Frequency of ASVs linked to algal clades recovered from soil samples. Clade affiliations: URA25, URA28 *sensu* Ruprecht et al. (2014). Clades I–XVIII were identified as new in present study. Amplicon sequence variants (ASVs) were sorted into these clades based on phylogenetic hypothesis presented in Online Resource 2/ Fig. S3
